# Supplementary material
Source: publisher figshare collection journal article supplement (https://acs.figshare.com/ndownloader/files/4581547)

# Supporting Information

## Discovery of Human Macrophage Migration Inhibitory Factor (MIF)-CD74 Inhibitors via Virtual Screening

Zoe Cournia, Lin Leng, Sunil Gandavadi, Xin Du, Richard Bucala,  
and William L. Jorgensen

Contribution from the Department of Chemistry, Yale University,  
New Haven, Connecticut 06520-8107, and the  
Department of Medicine, Yale University School of Medicine,  
New Haven, Connecticut 06520-8066

### Table of Contents

1. General Information ..... S2
2.  $^1\text{H}$  NMR and Mass Spectra Charts .....S2-S24

# 1. General Information

S-2

NMR spectra were recorded on a Bruker Avance DRX-500 (500 MHz) and LRMS (ESI-TOF) analysis was performed at the Yale Chemical Instrumentation Center.

## 2. $^1\text{H}$ NMR and LRMS Spectra Charts

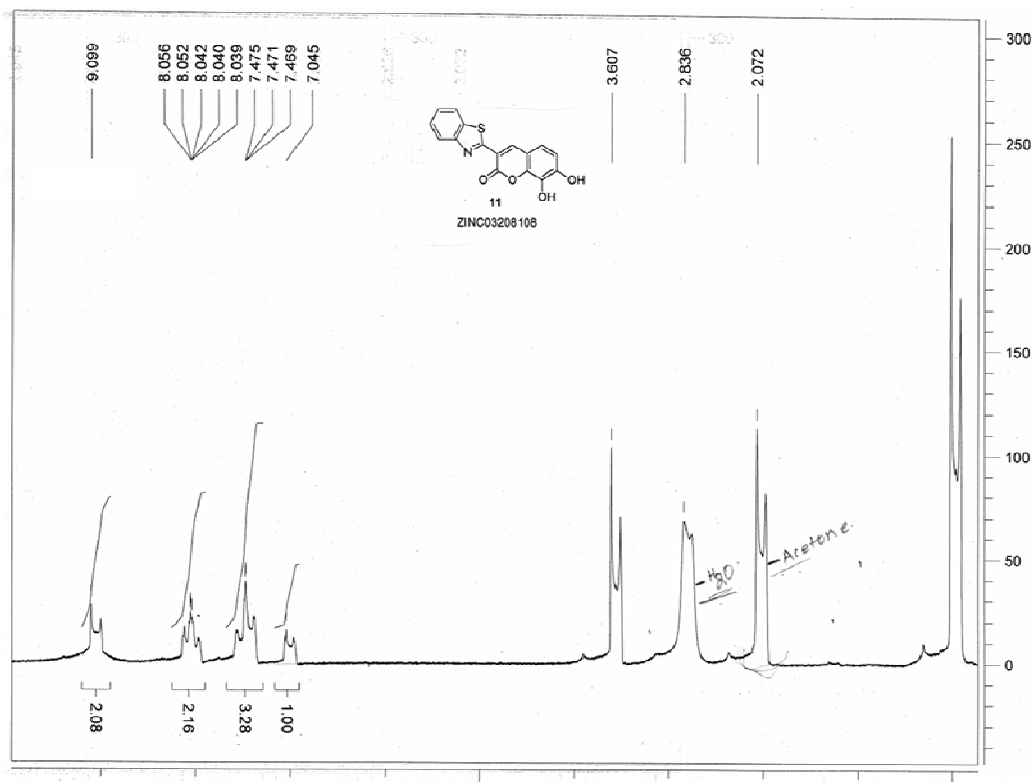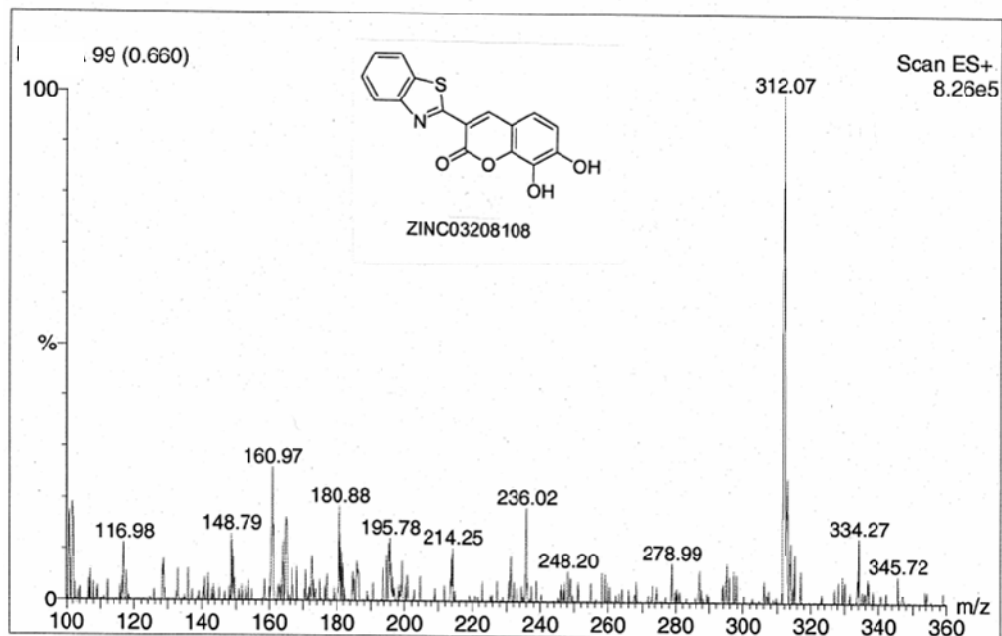

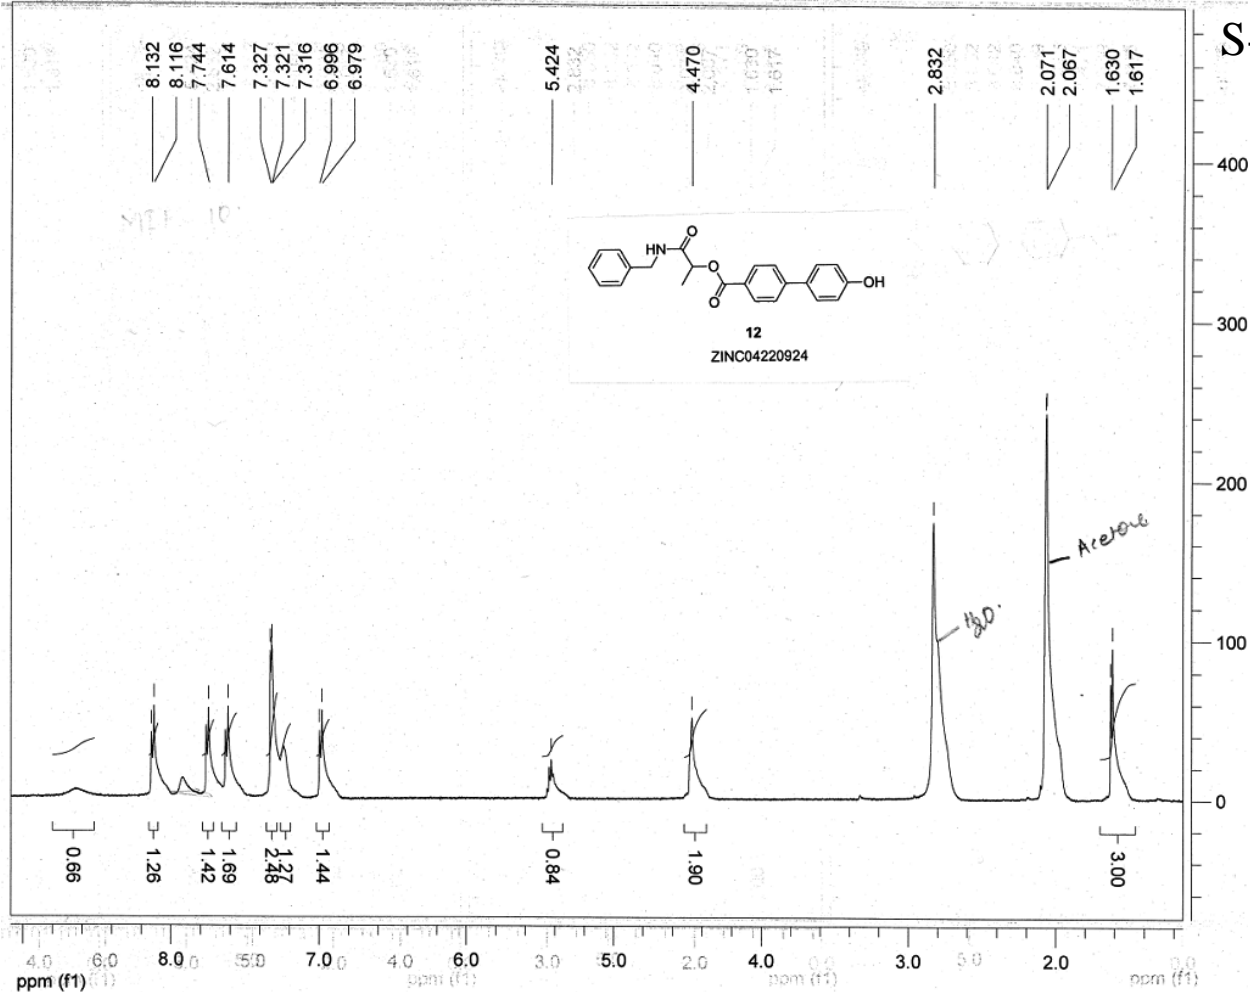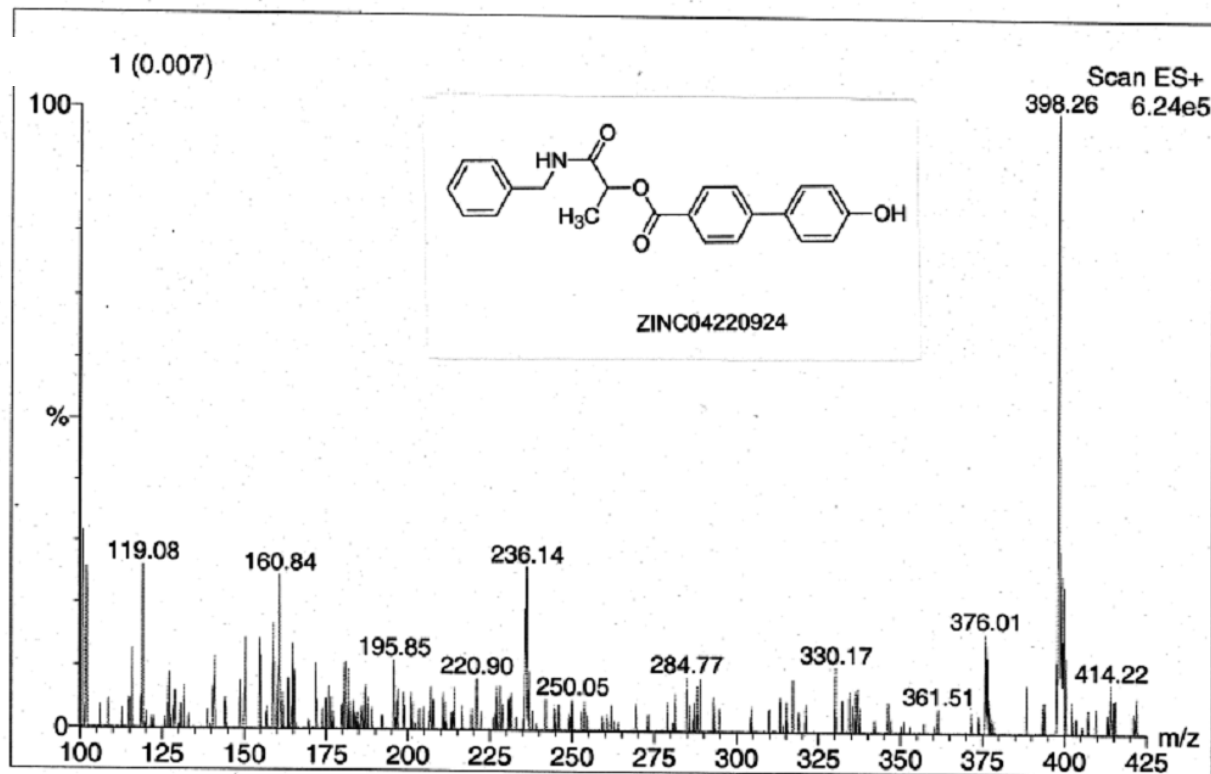

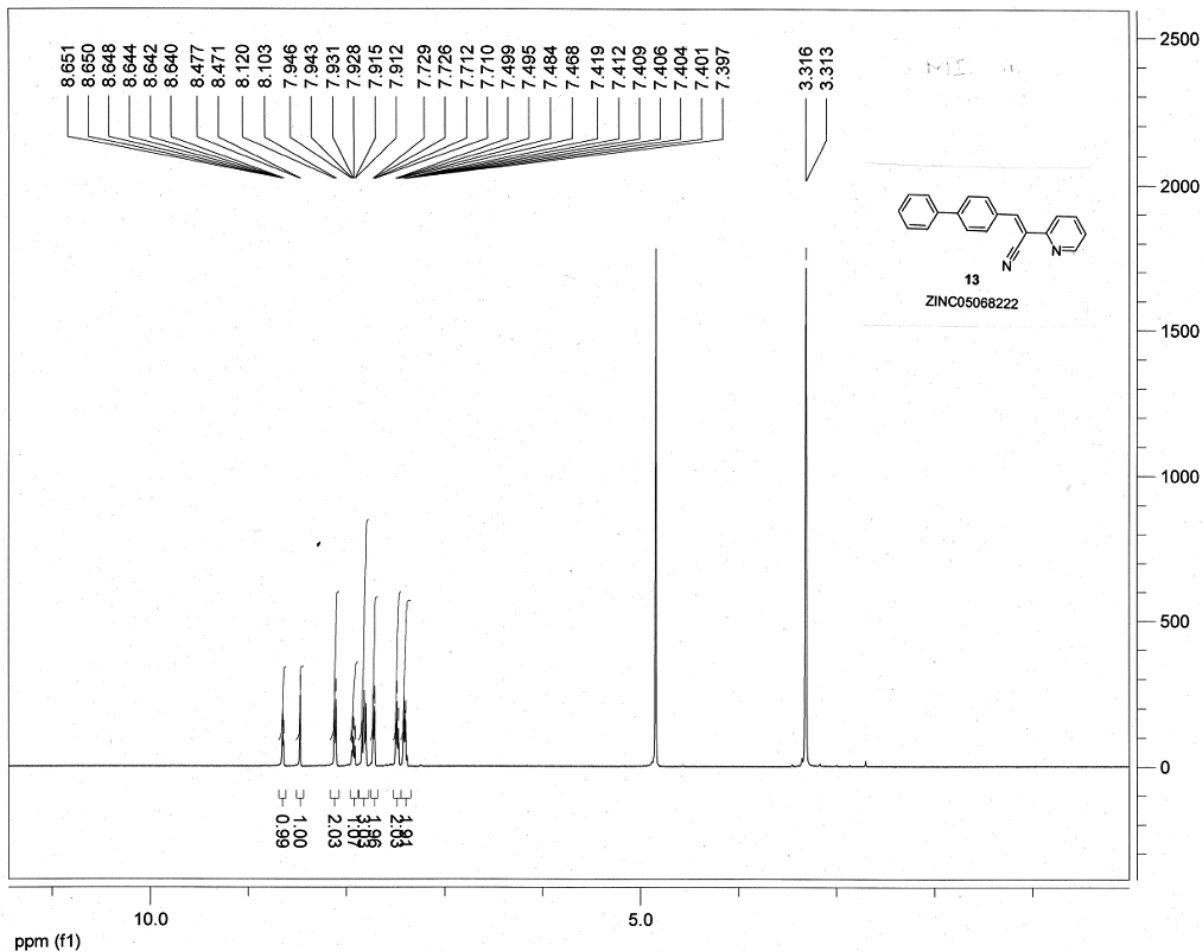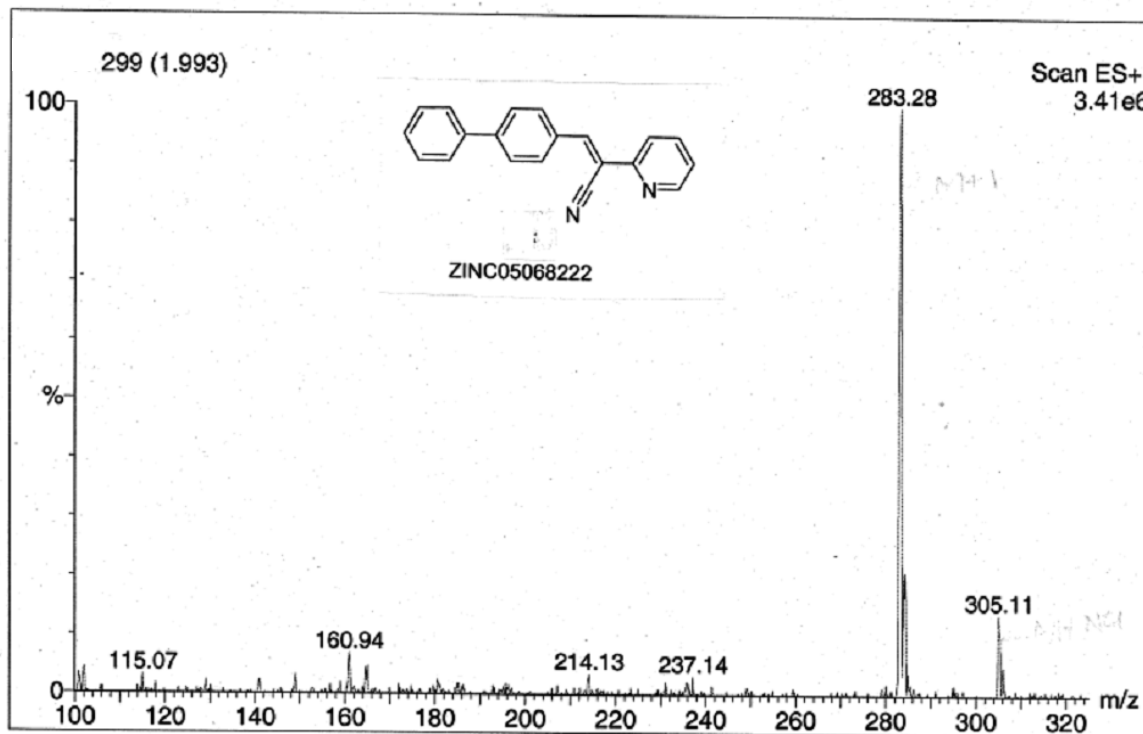

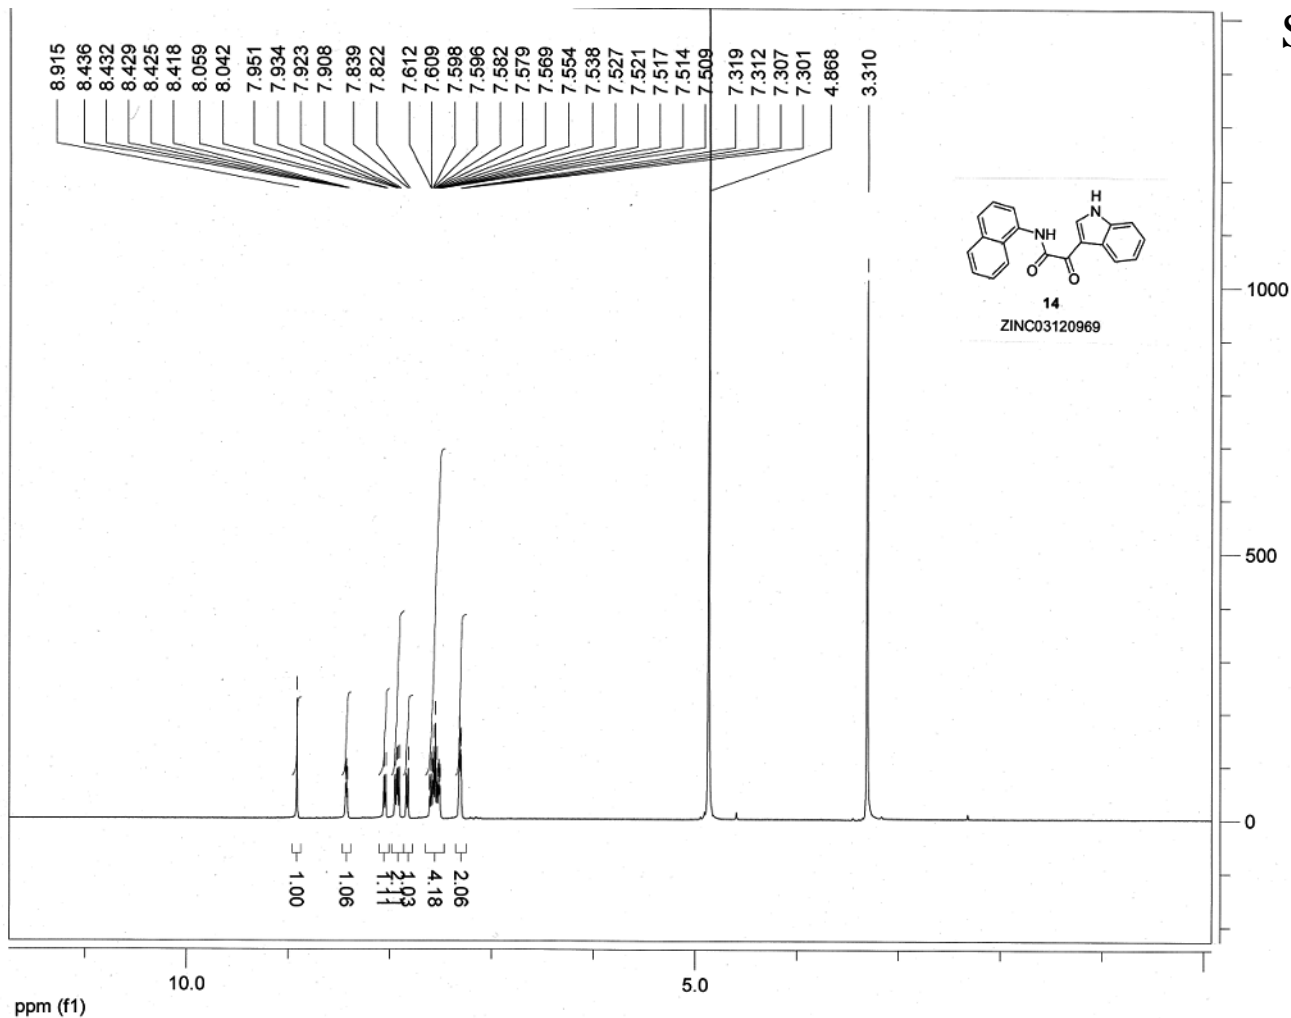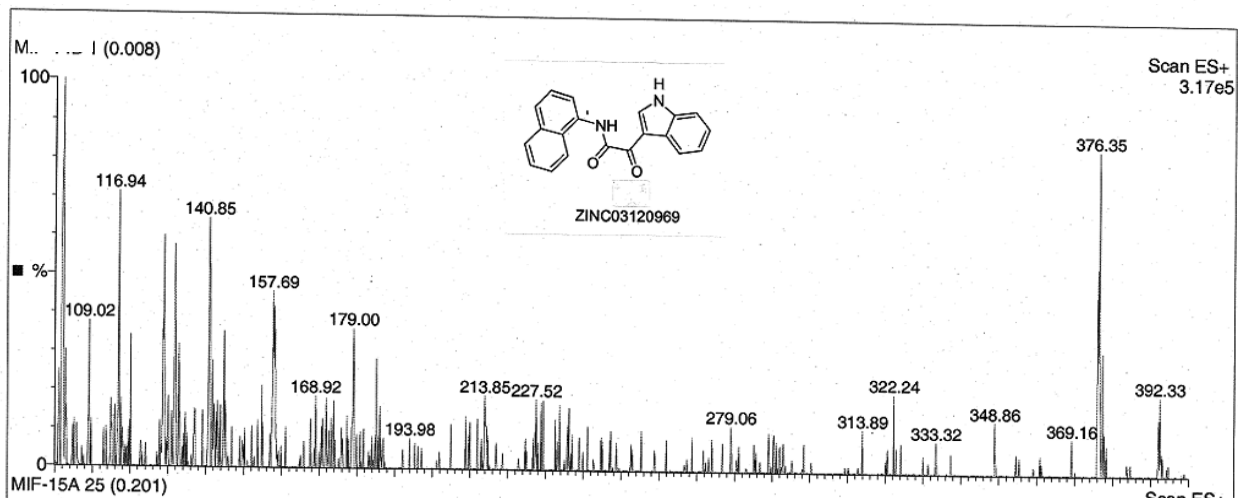

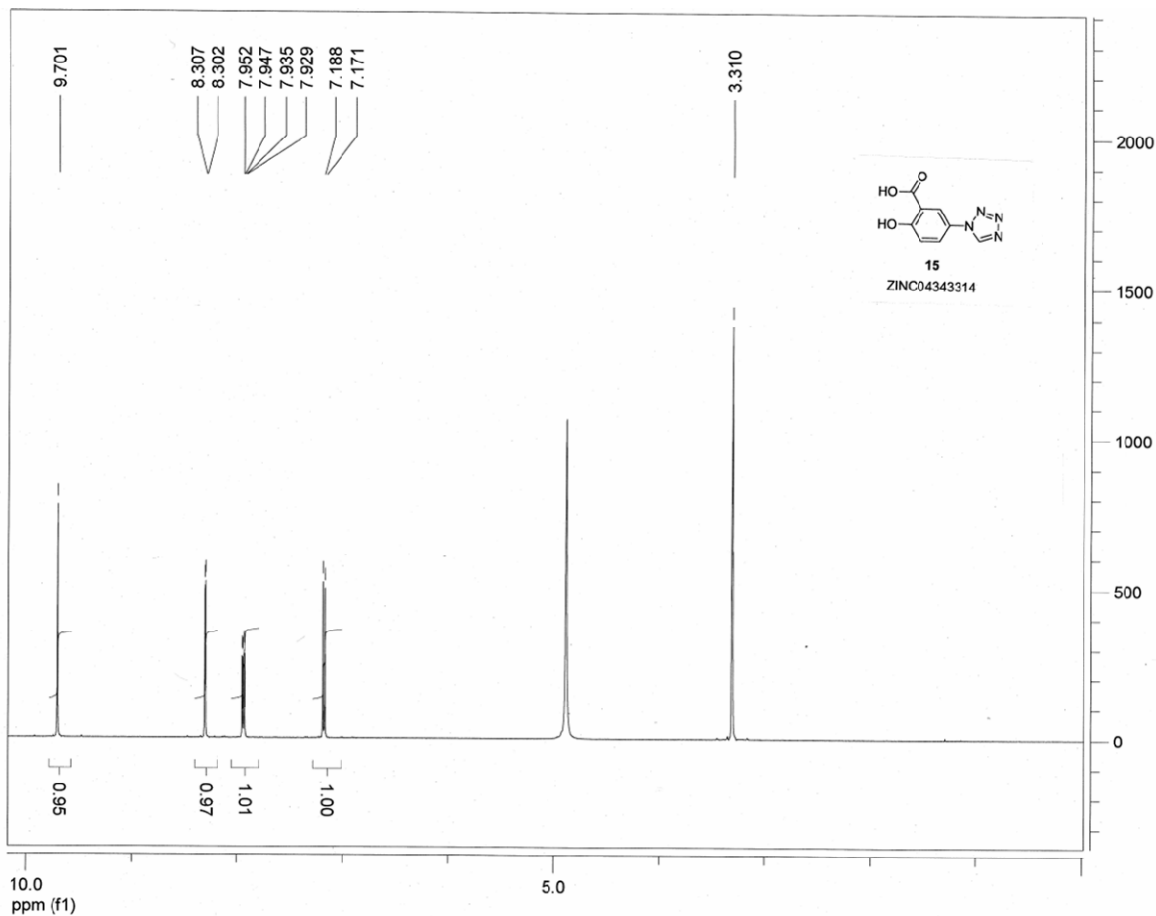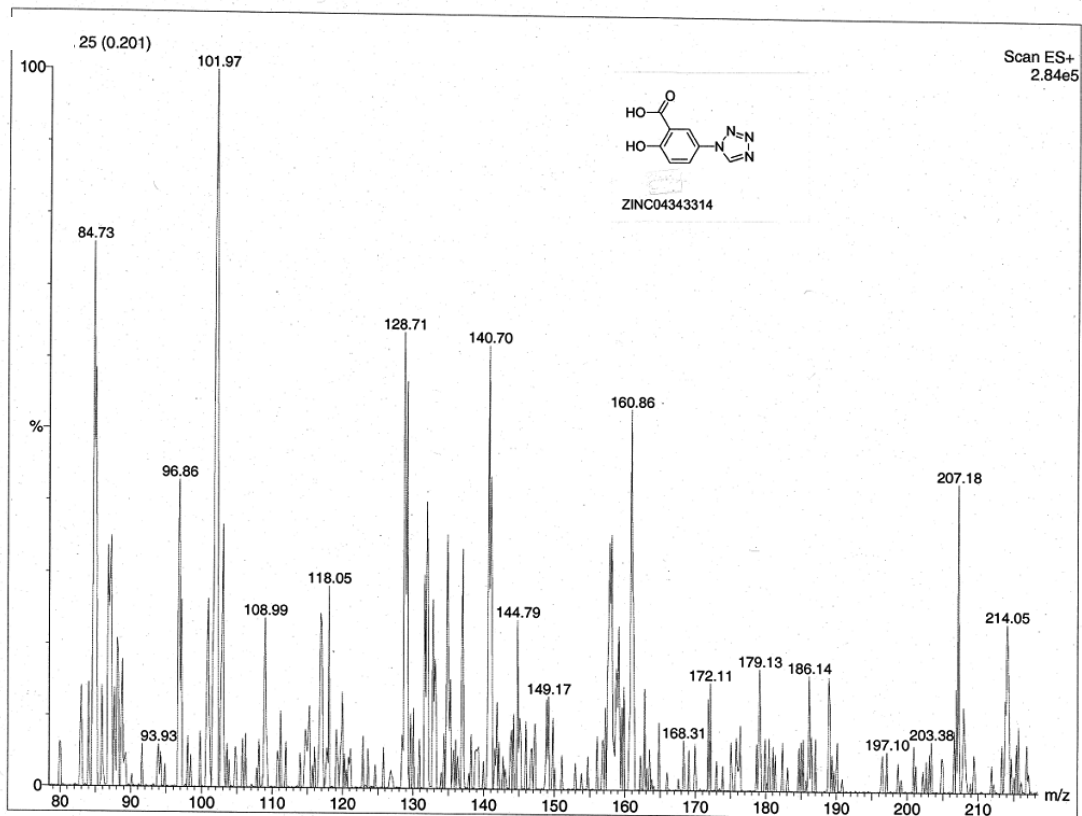

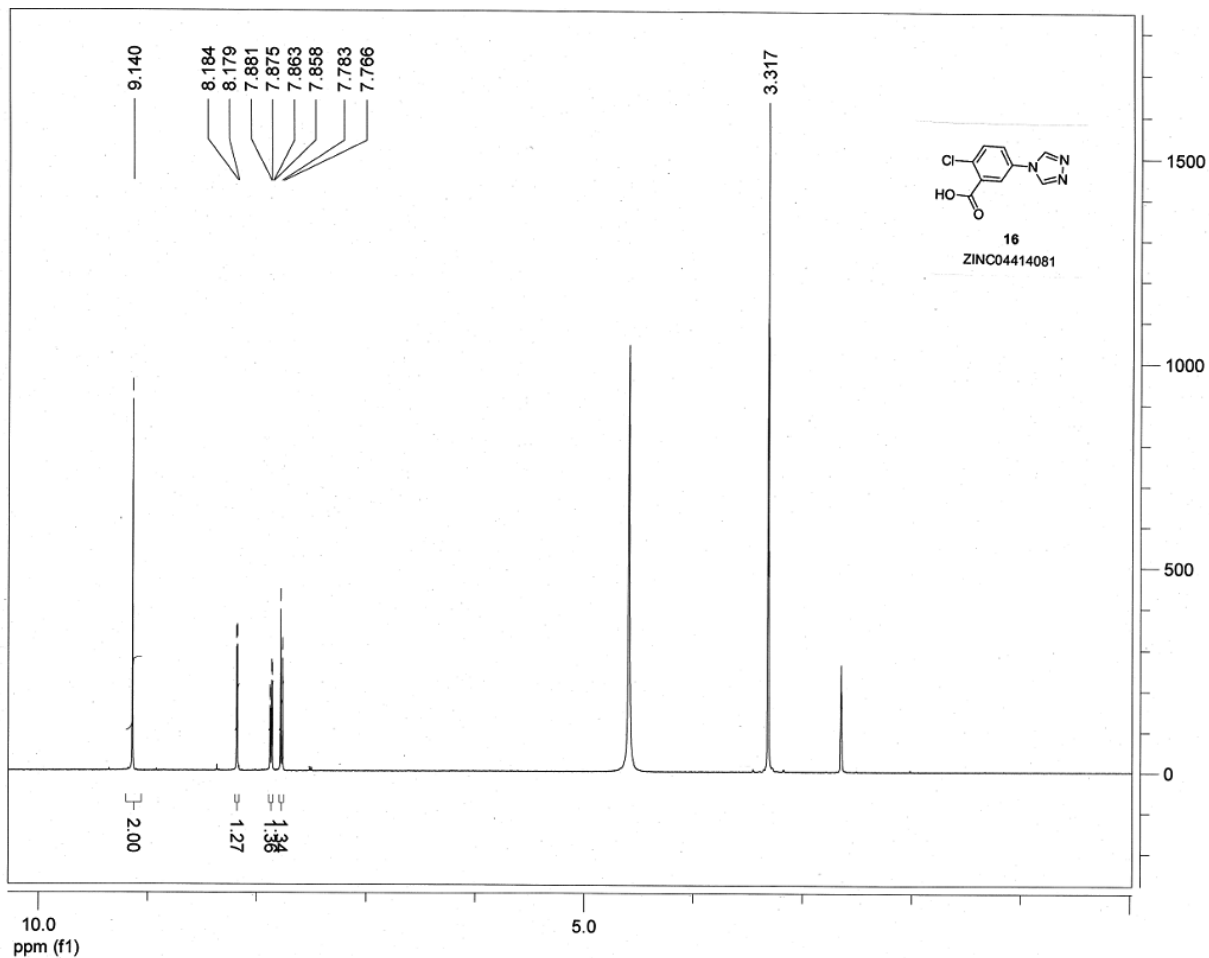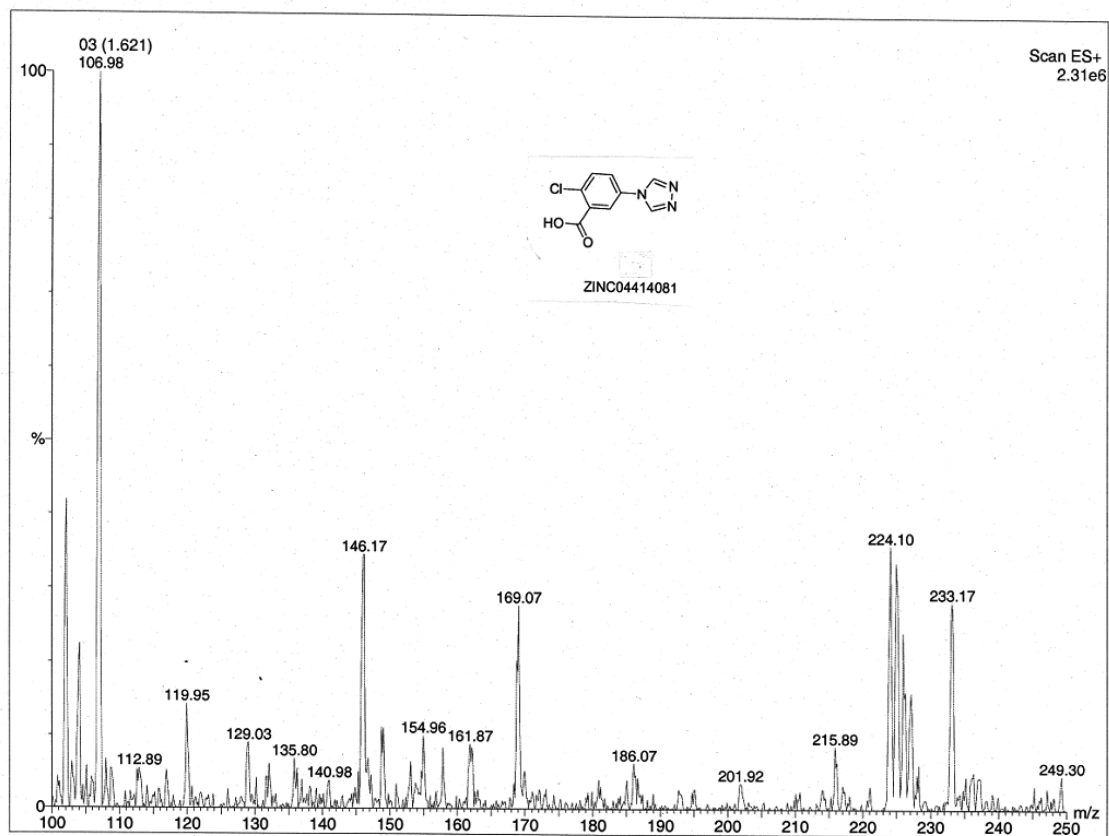

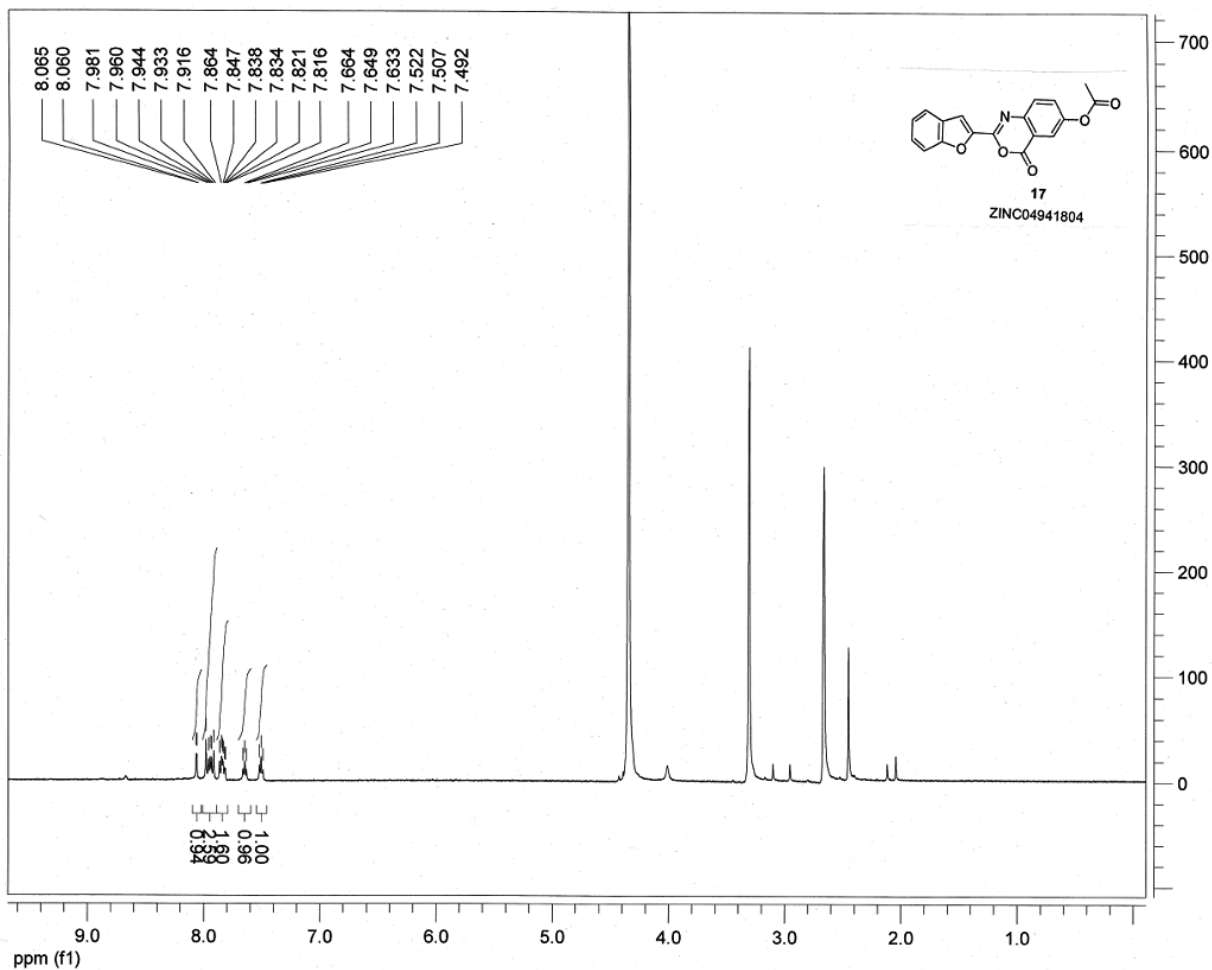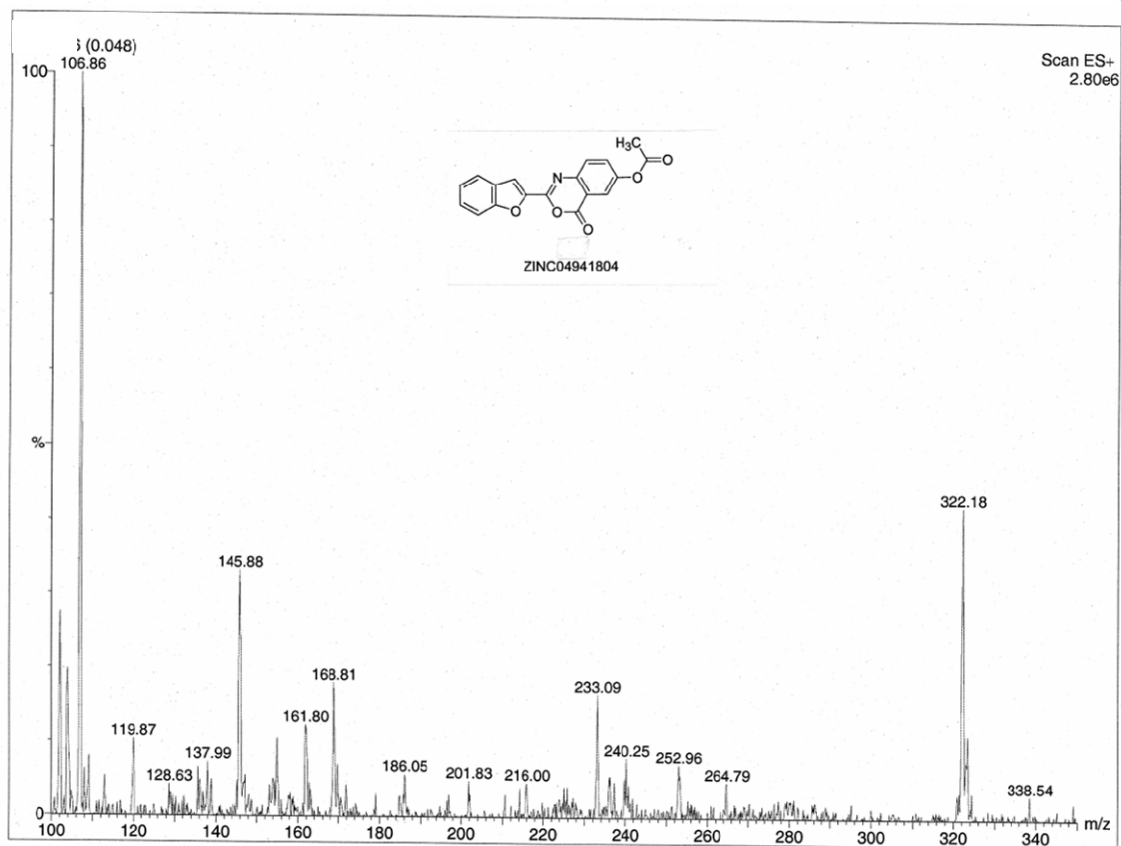



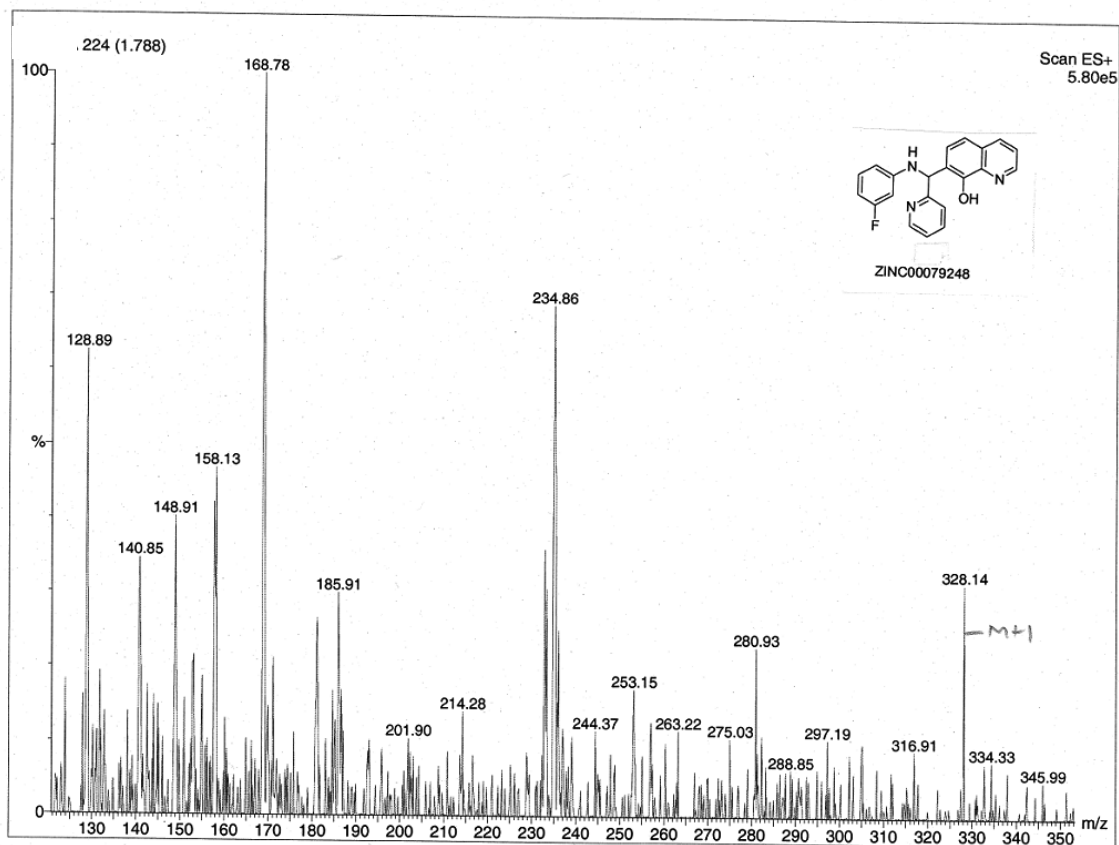

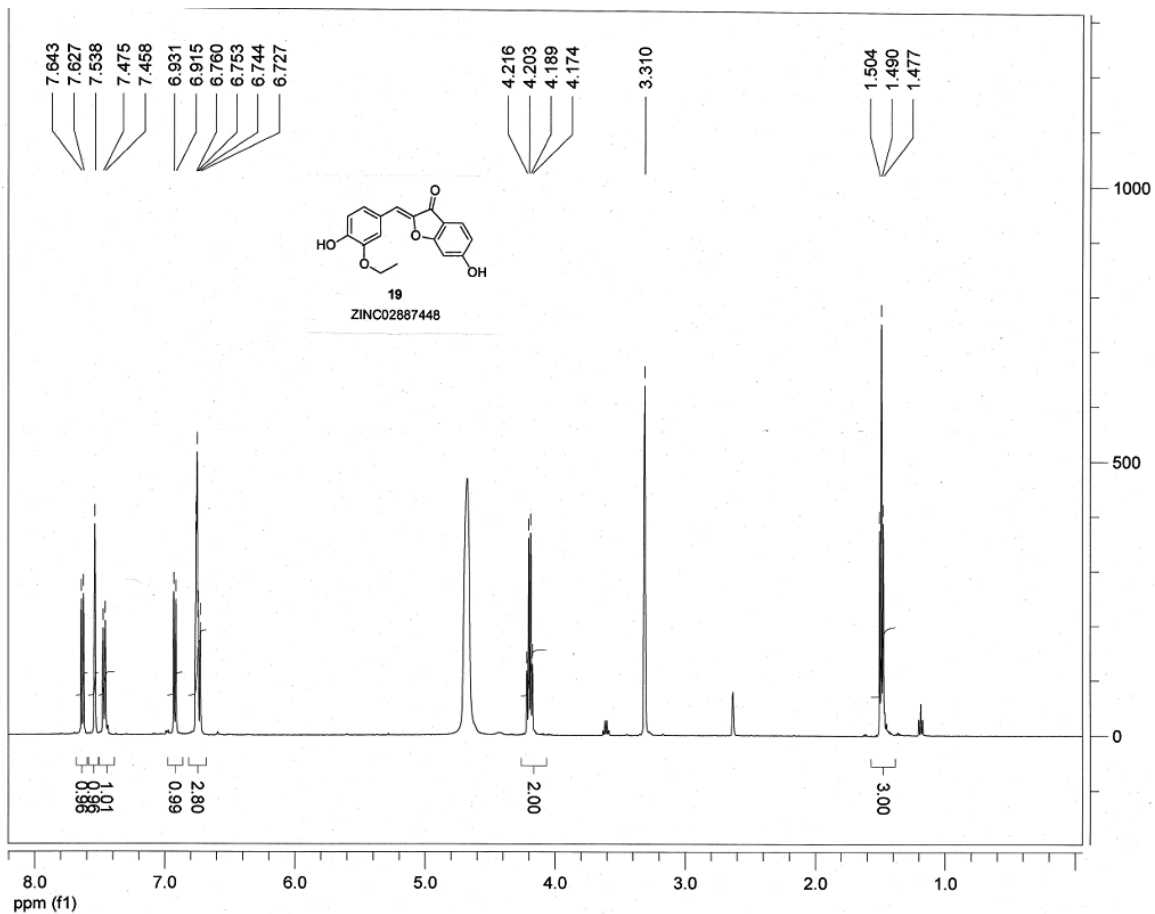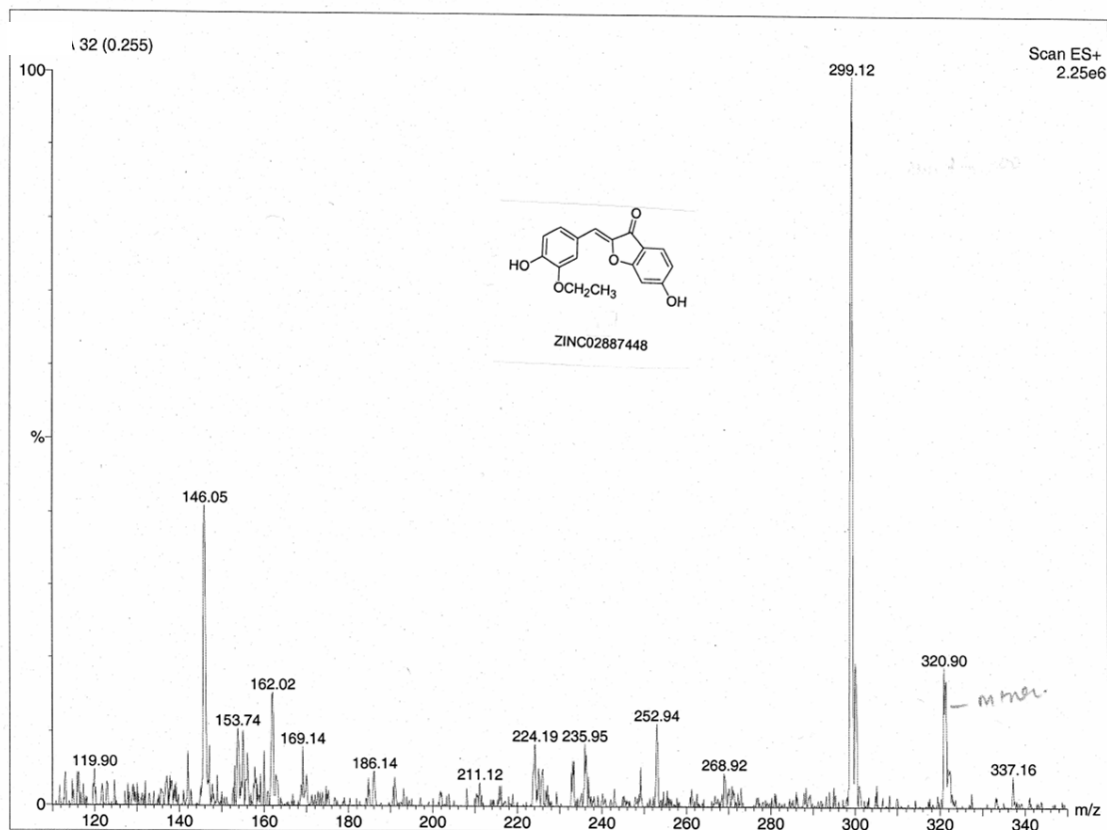

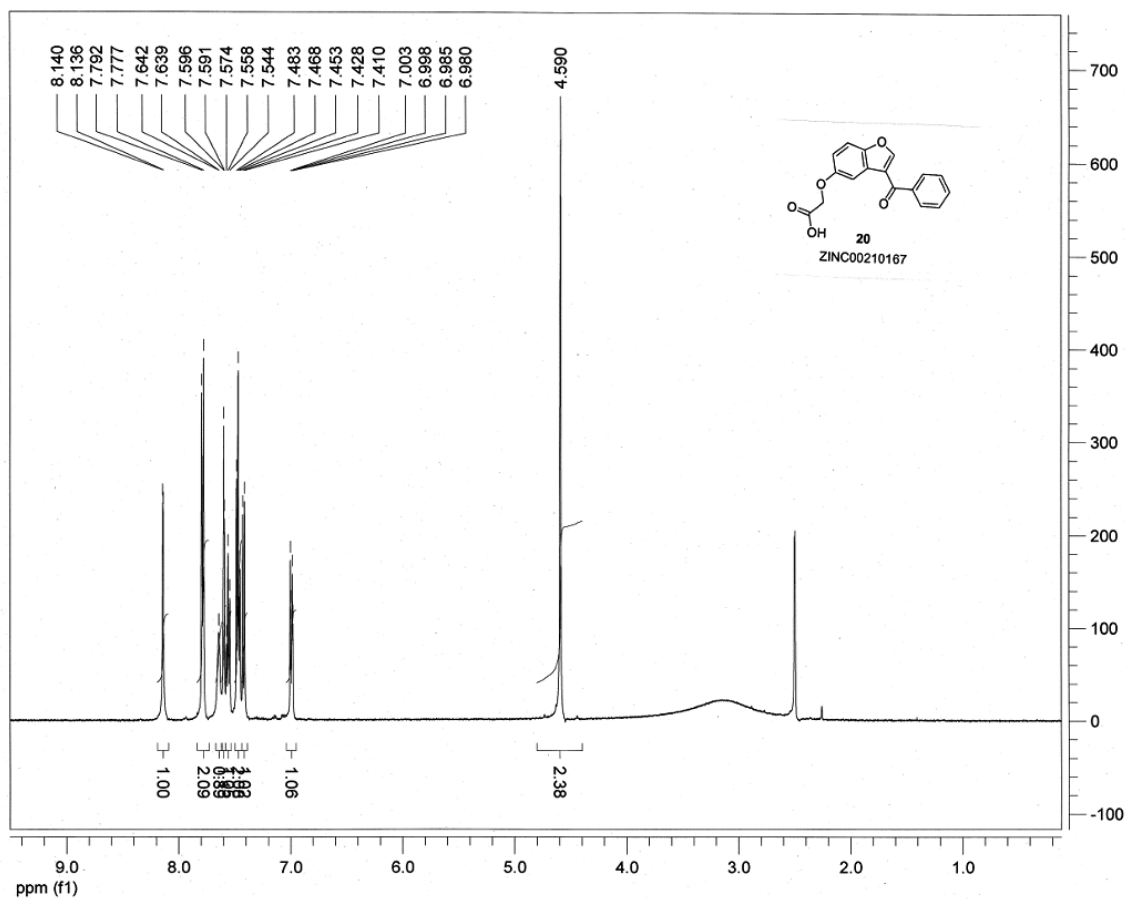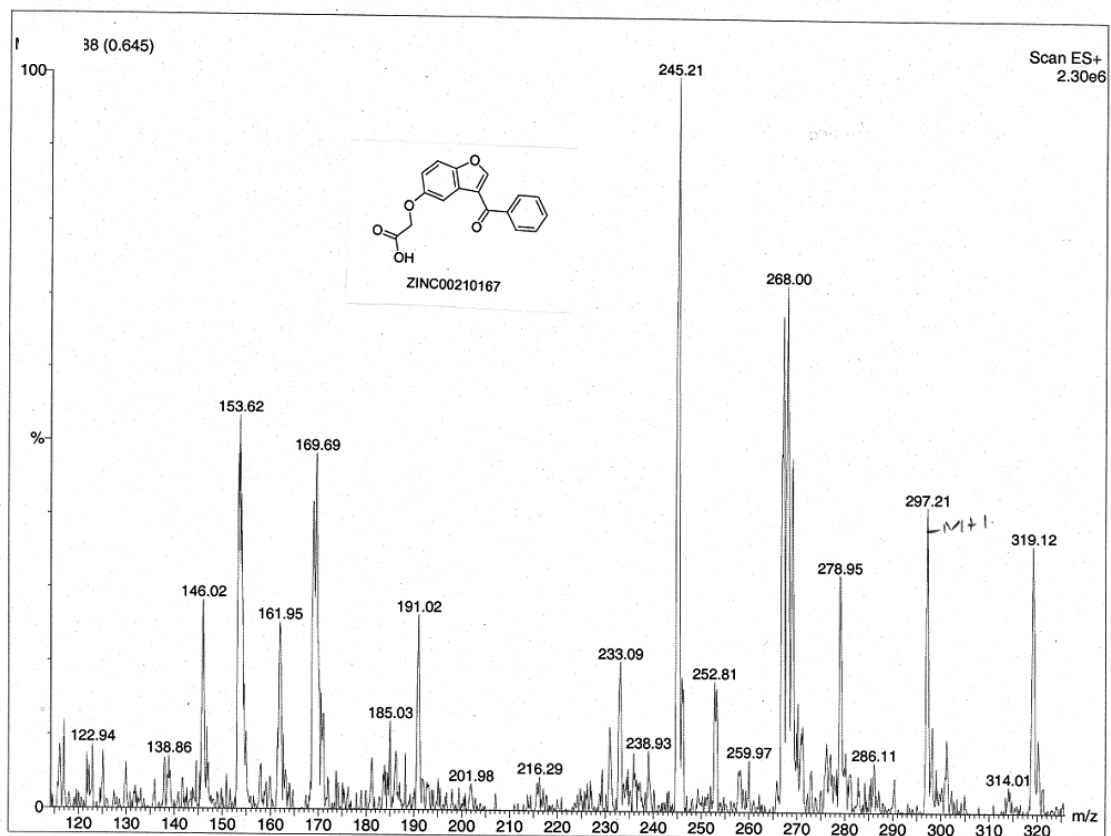

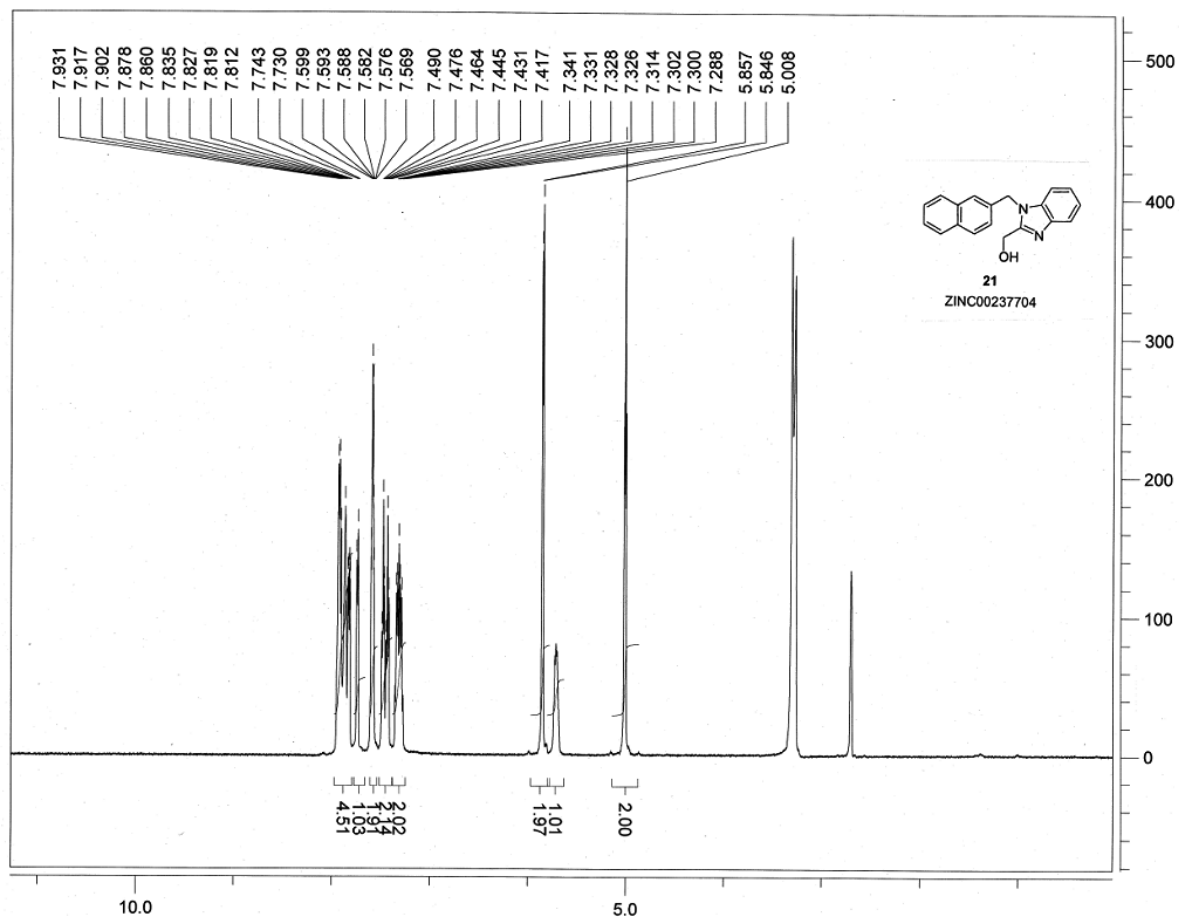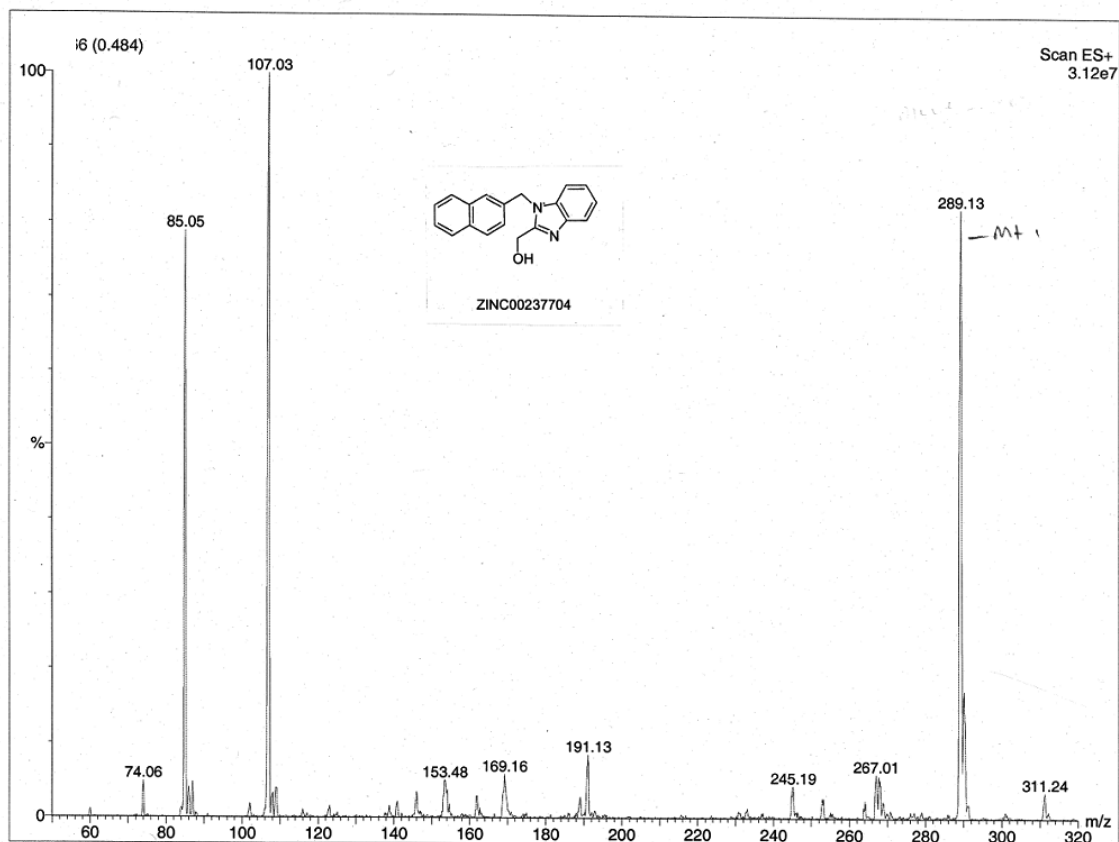

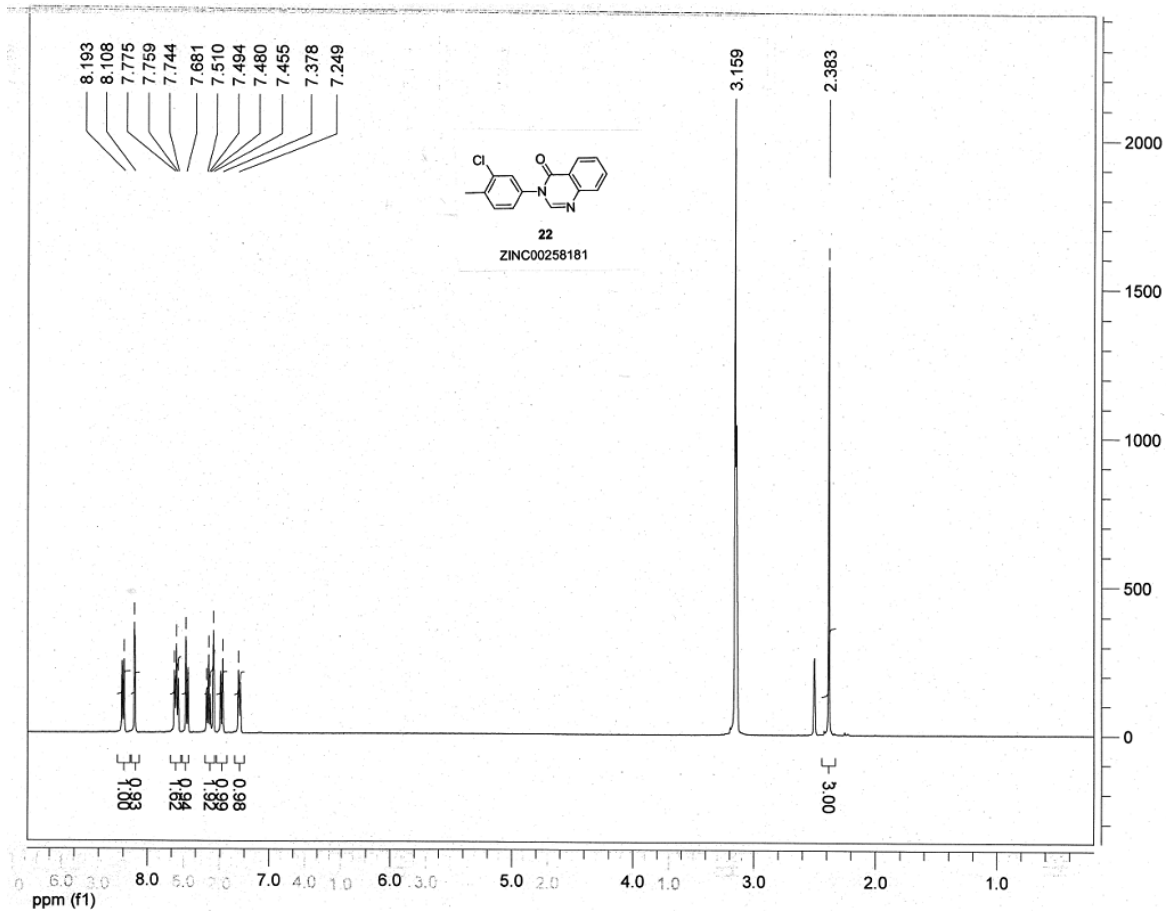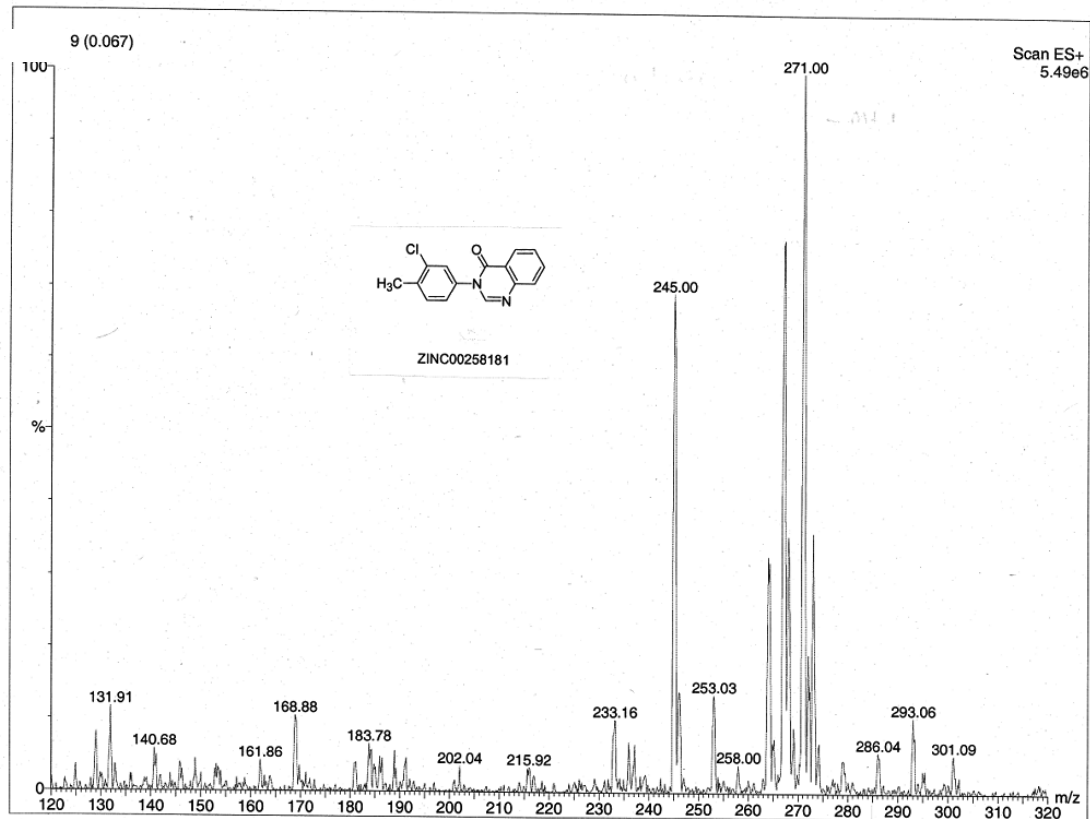

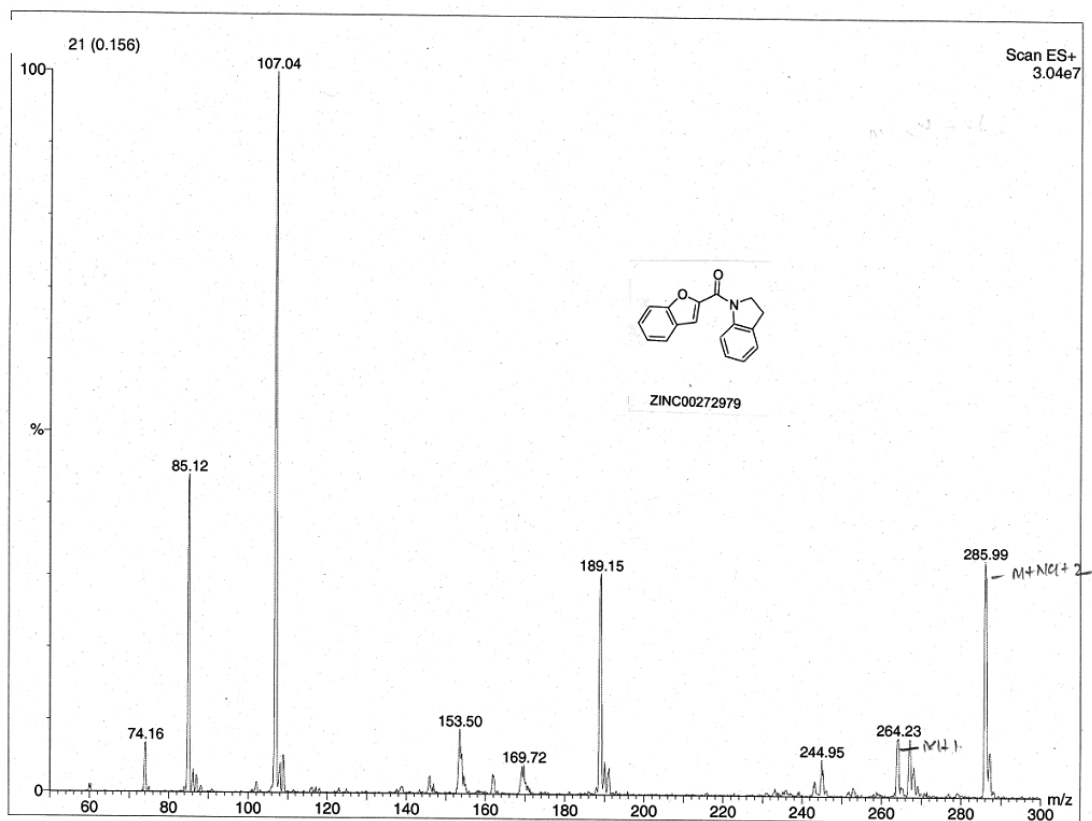

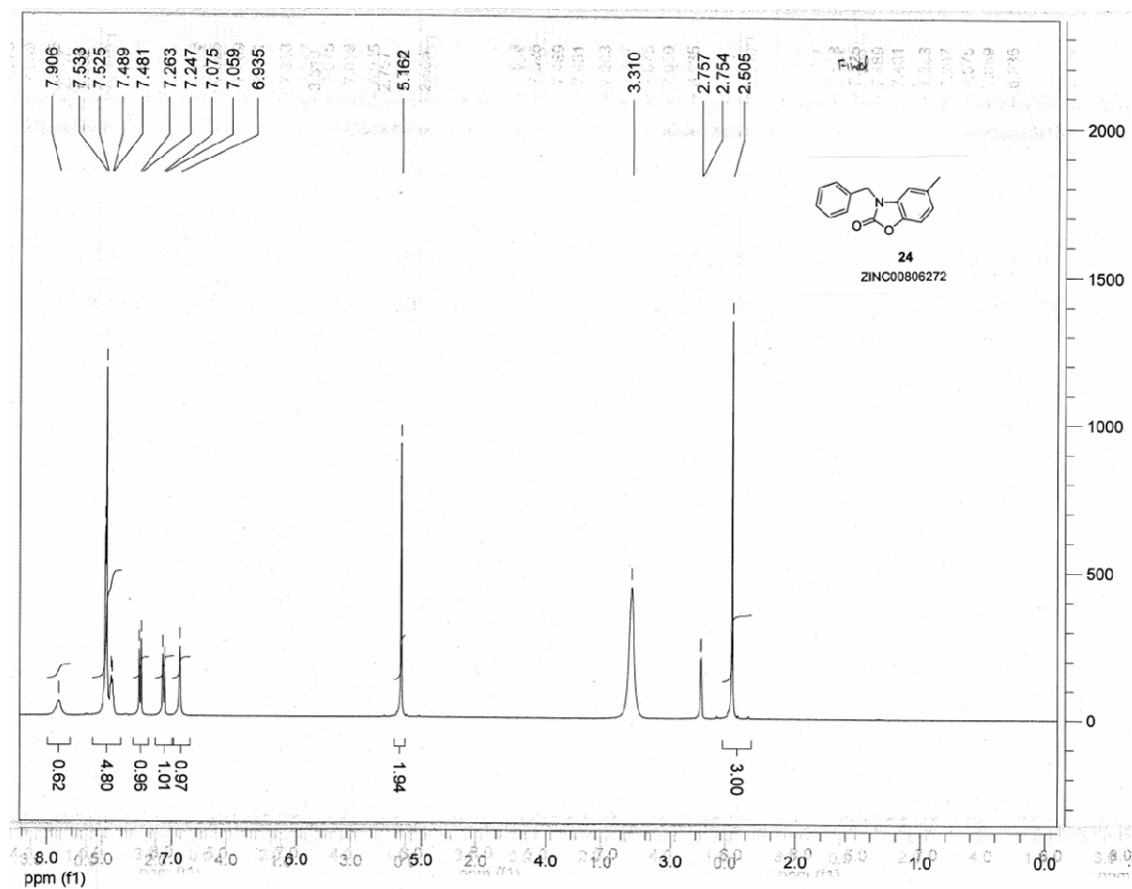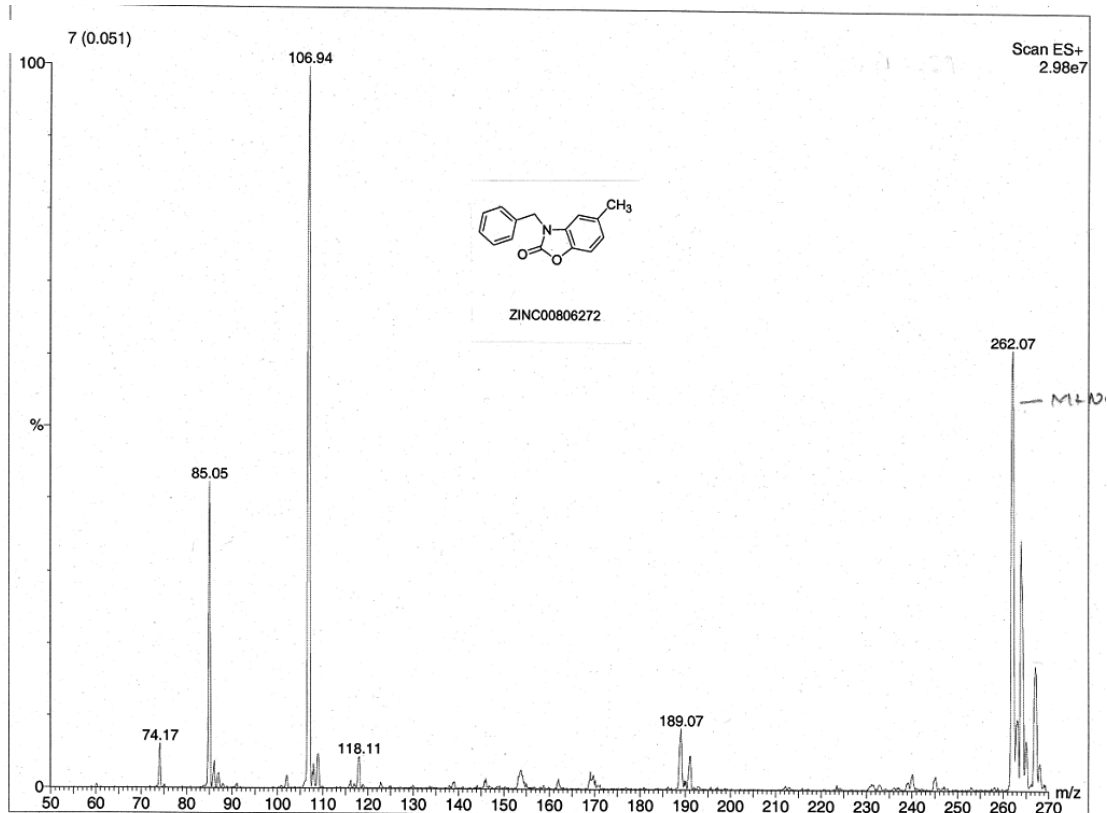

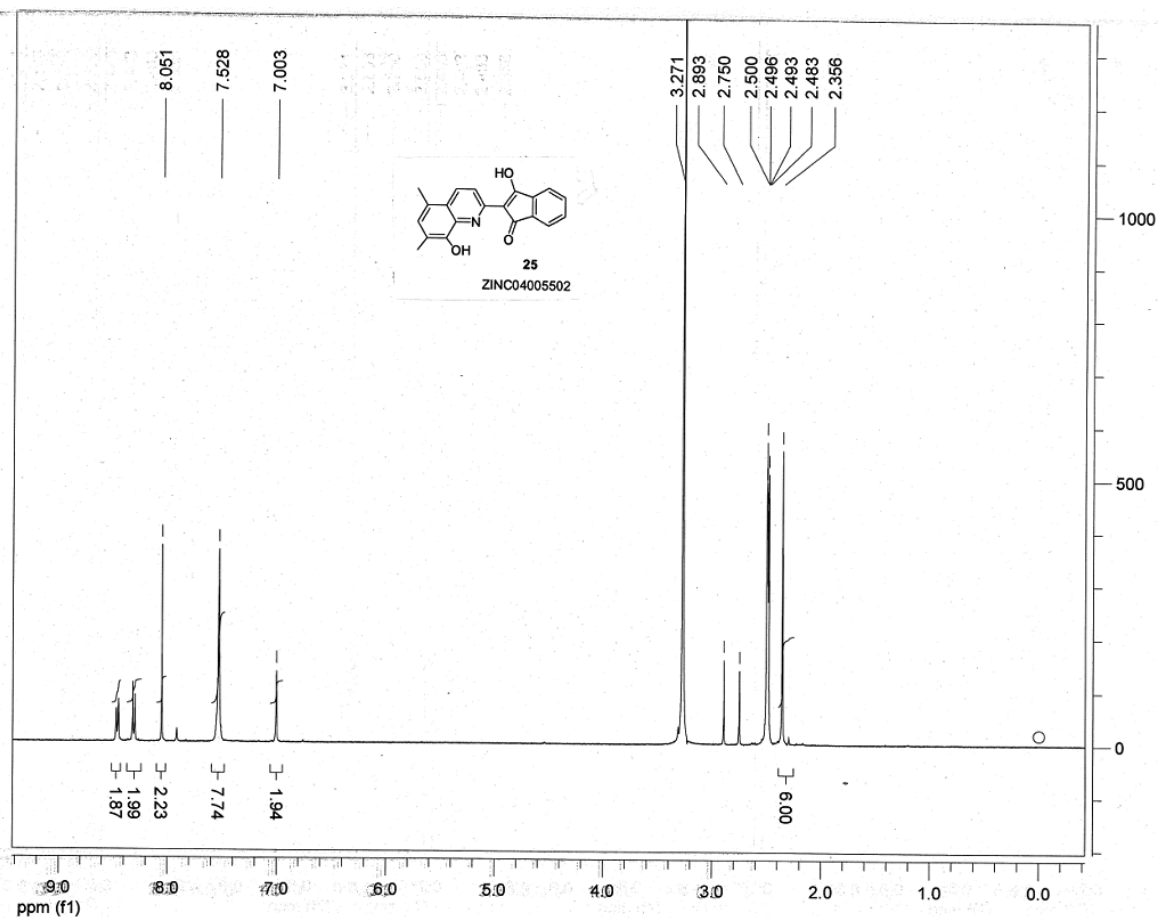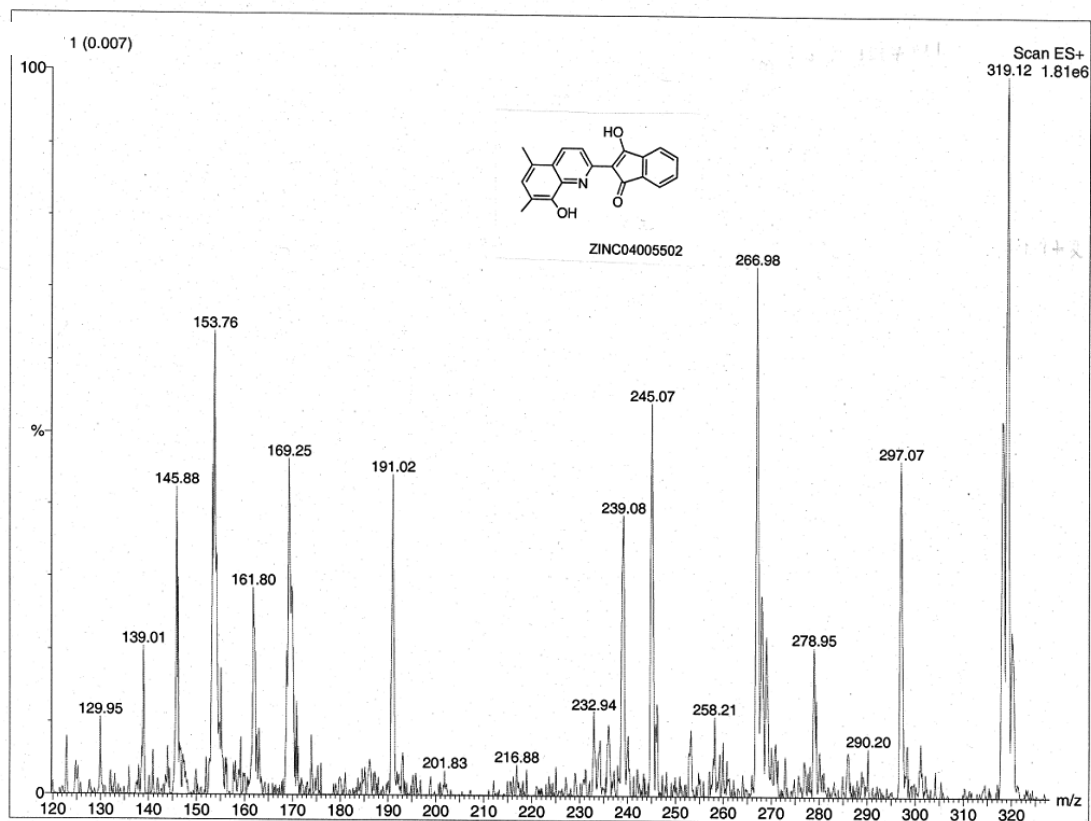



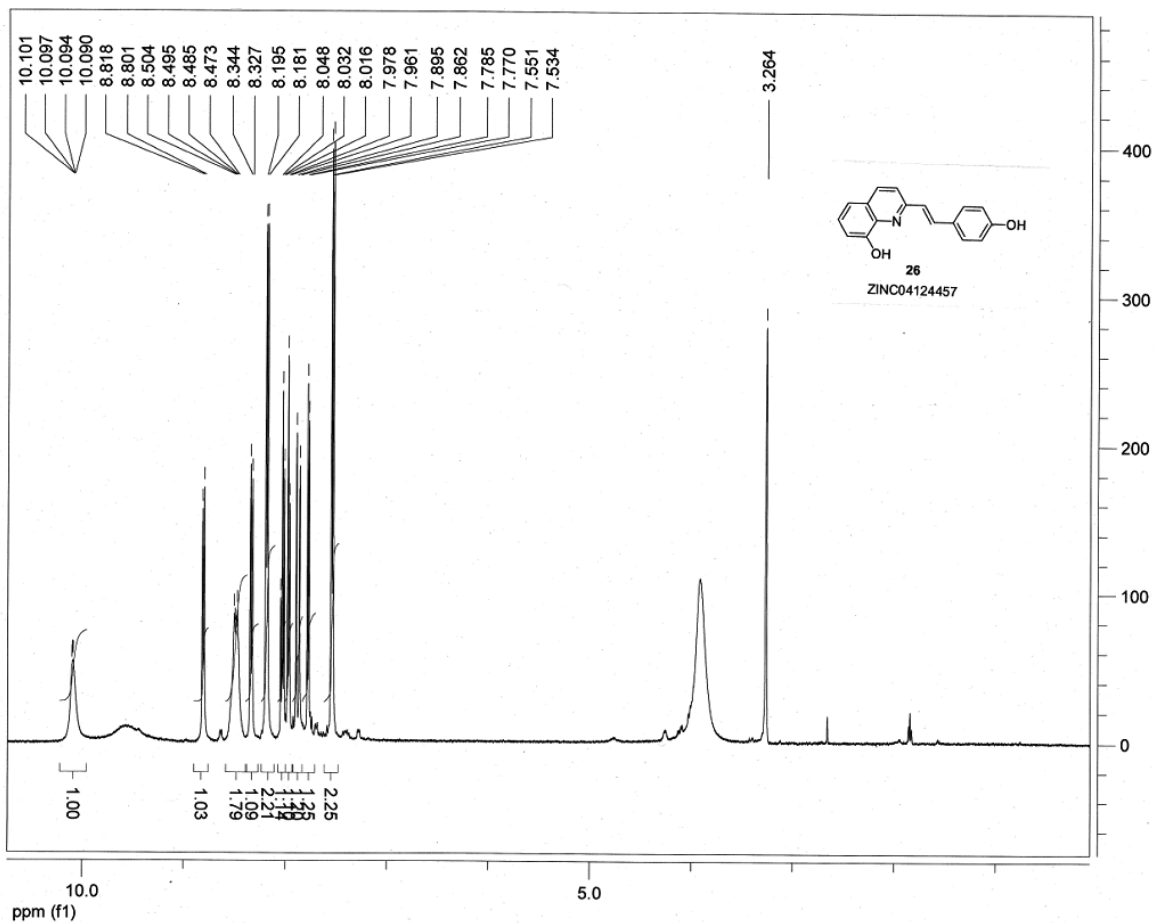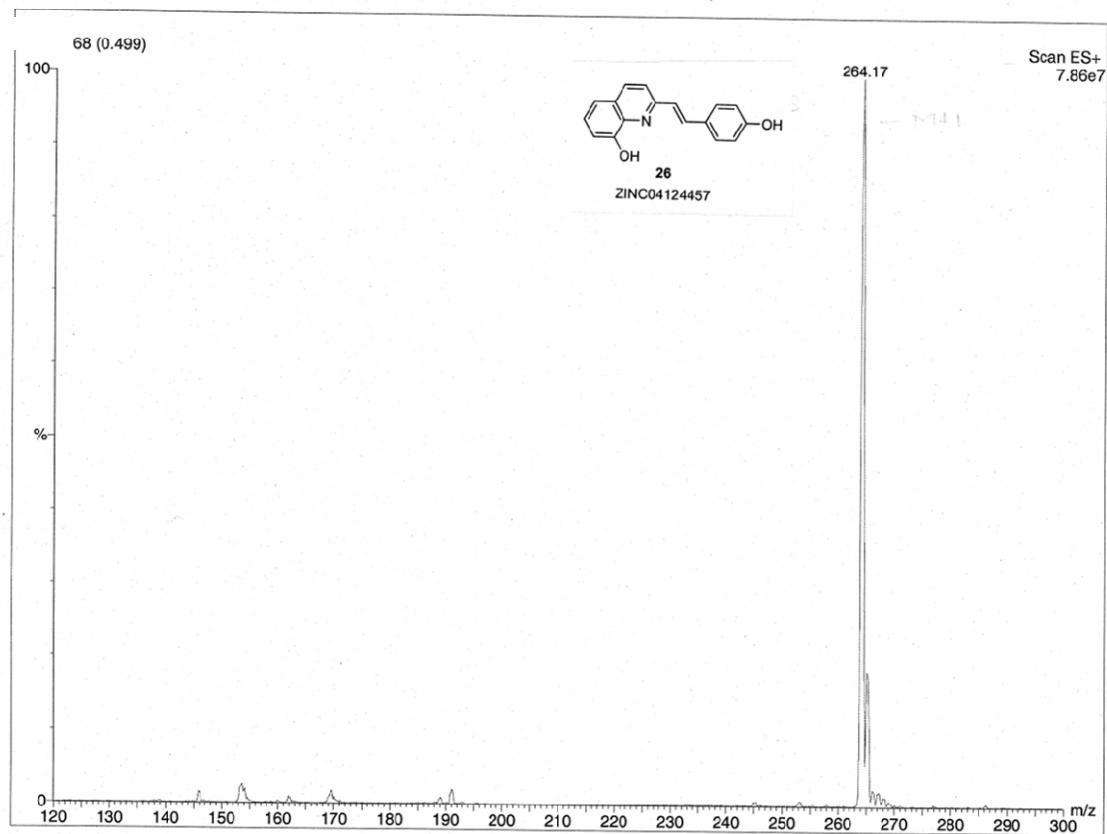

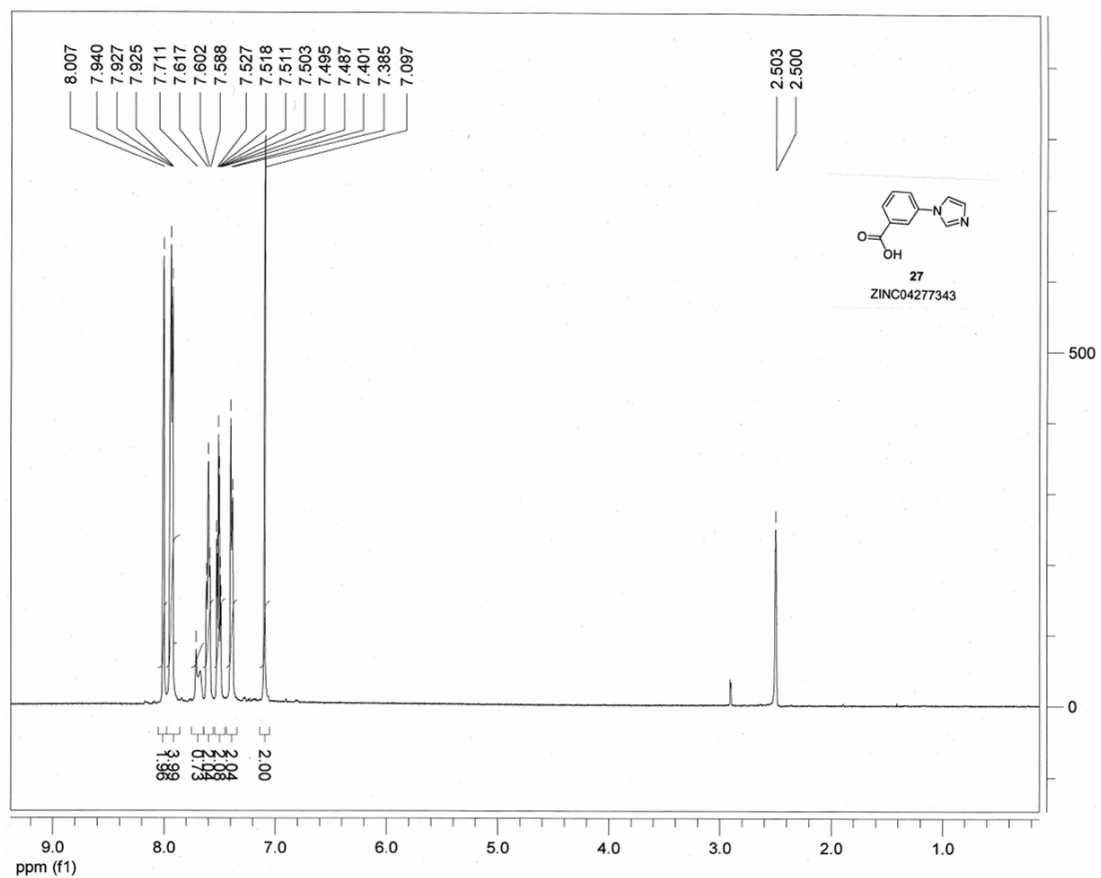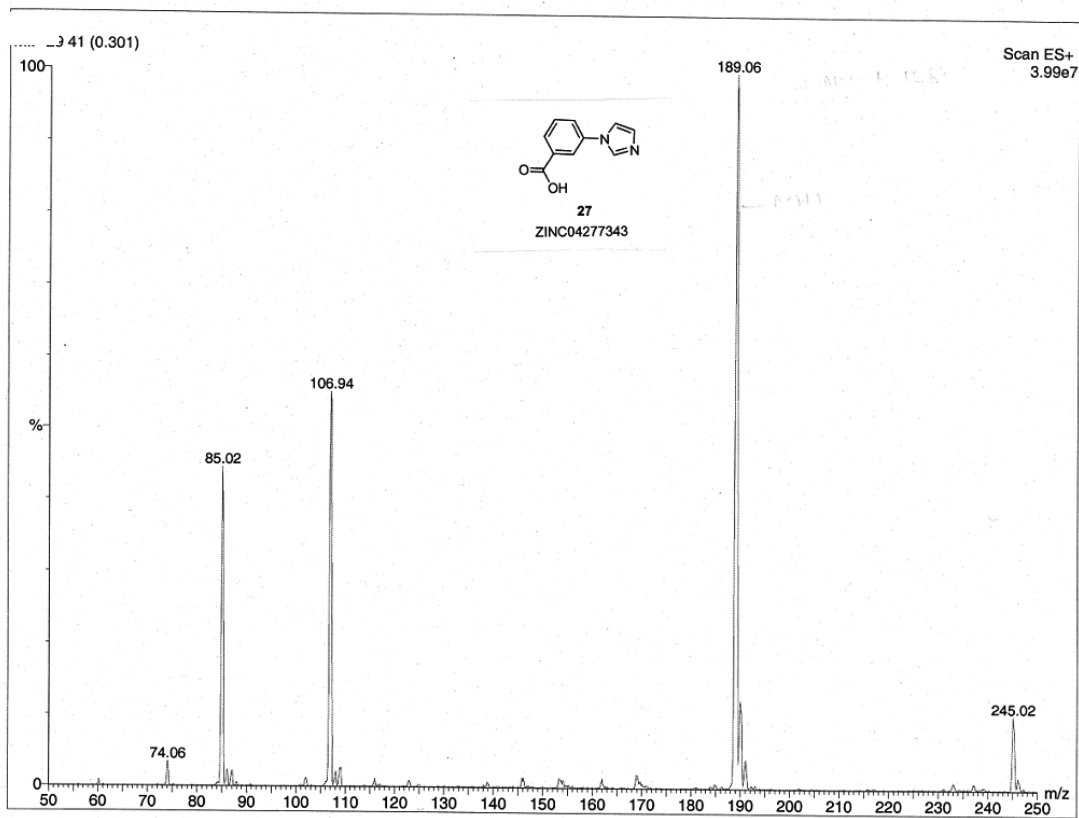

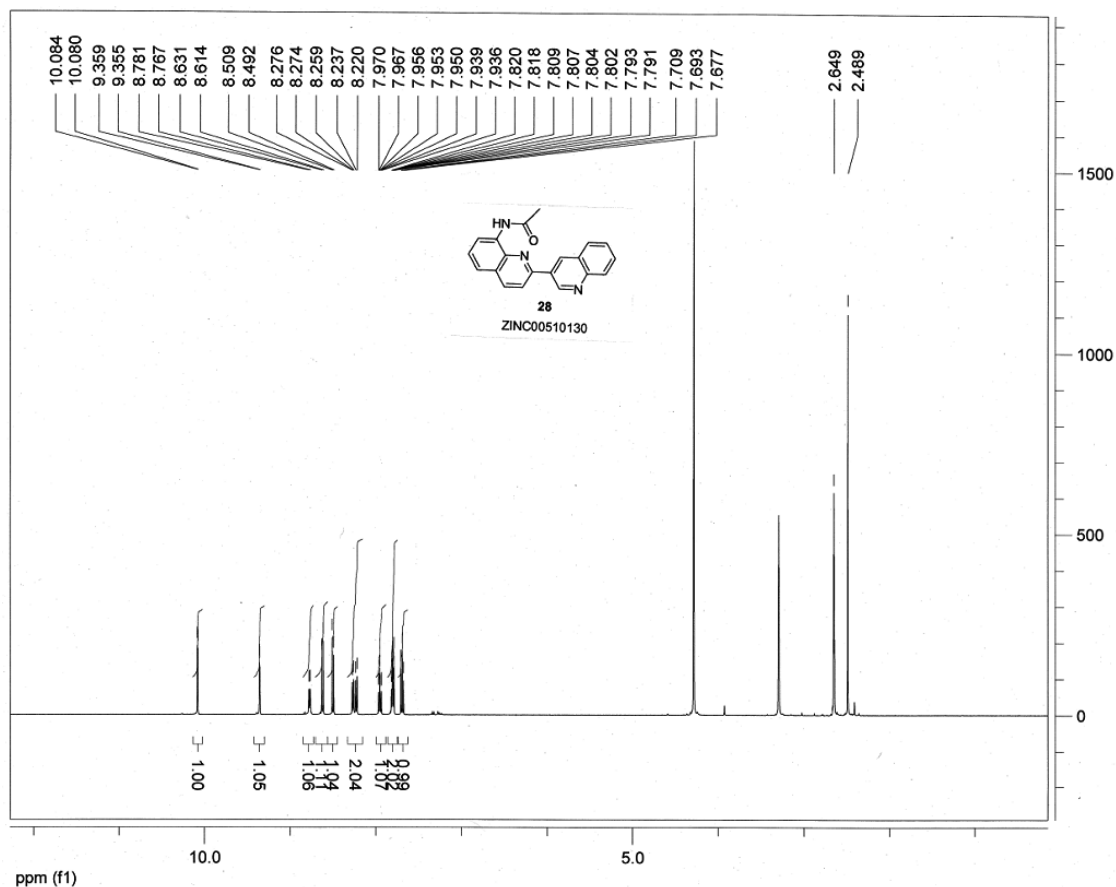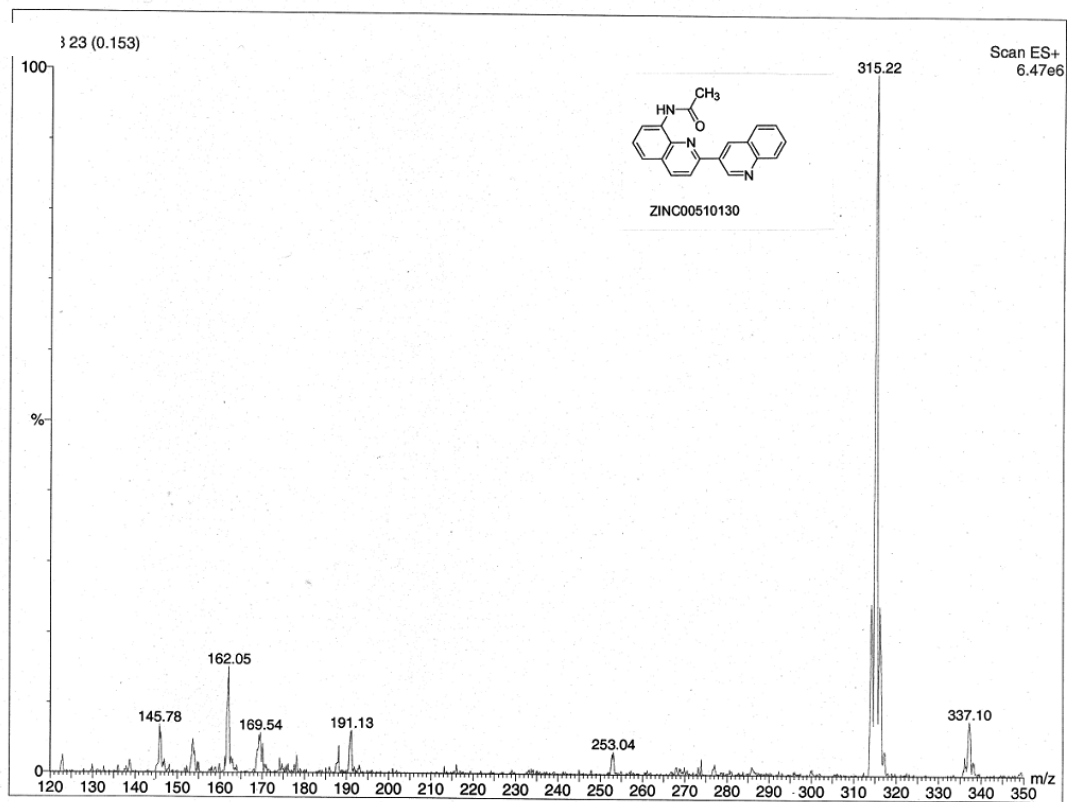

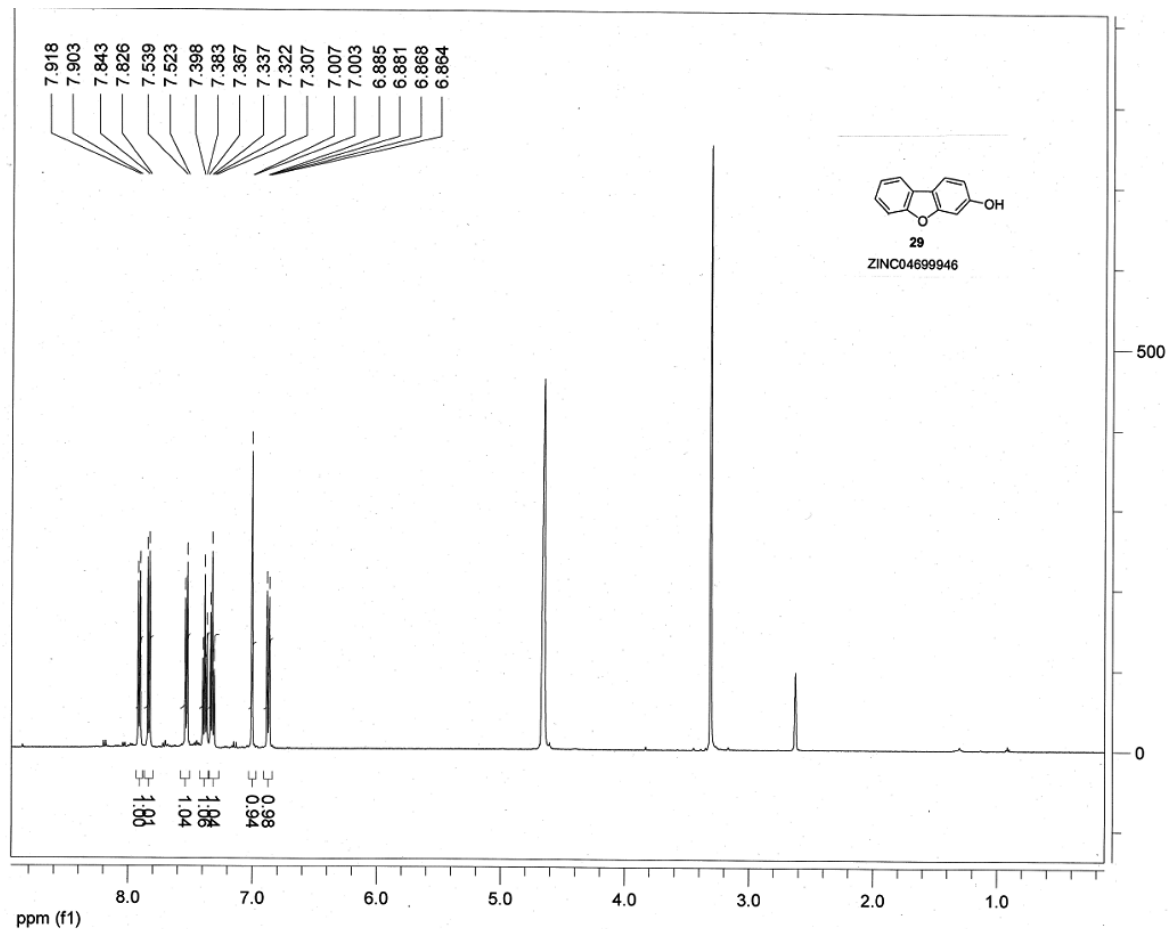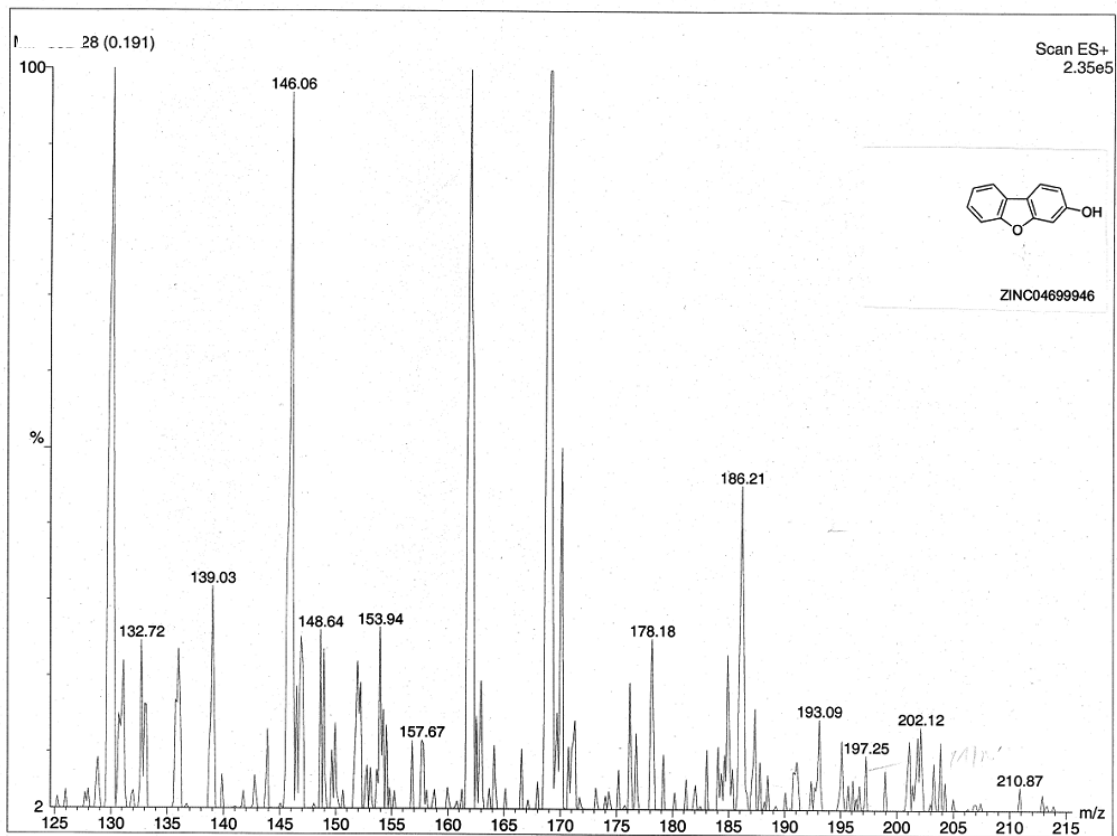

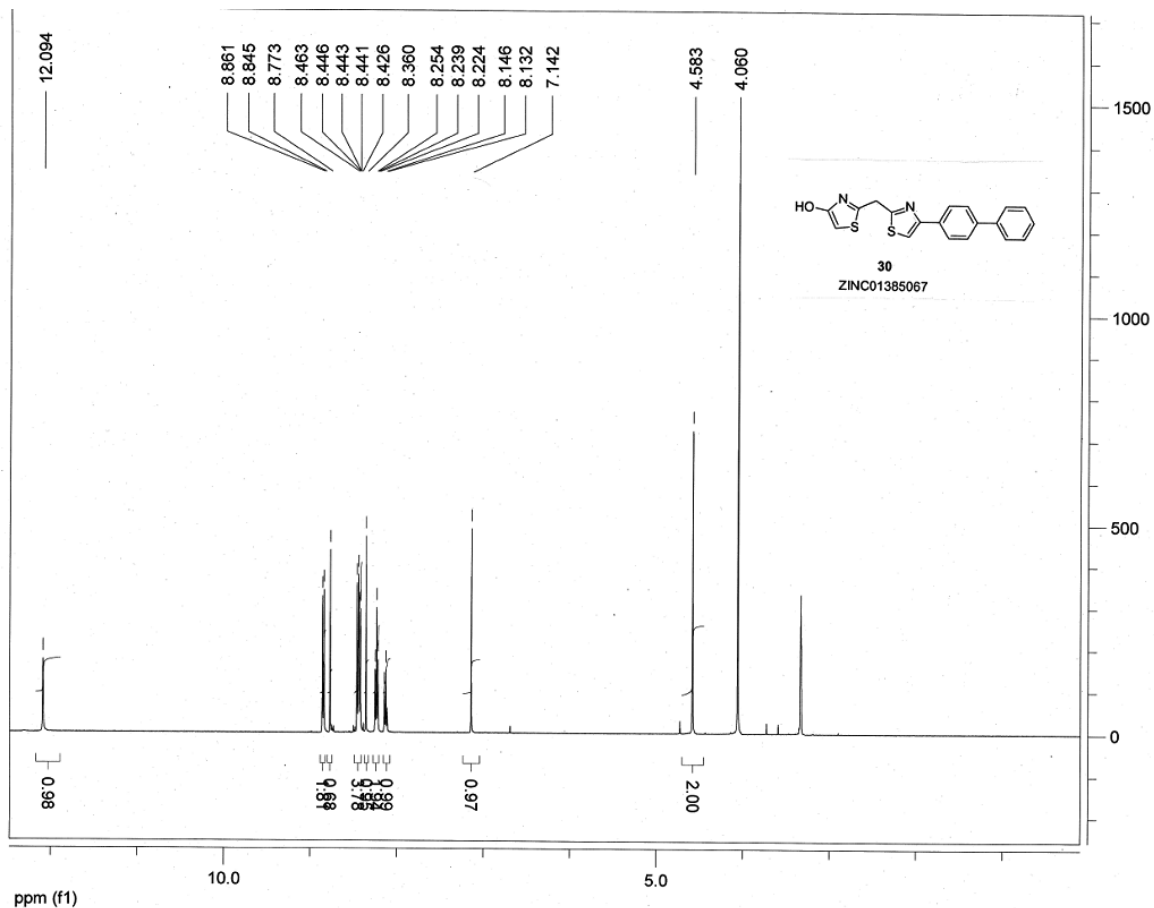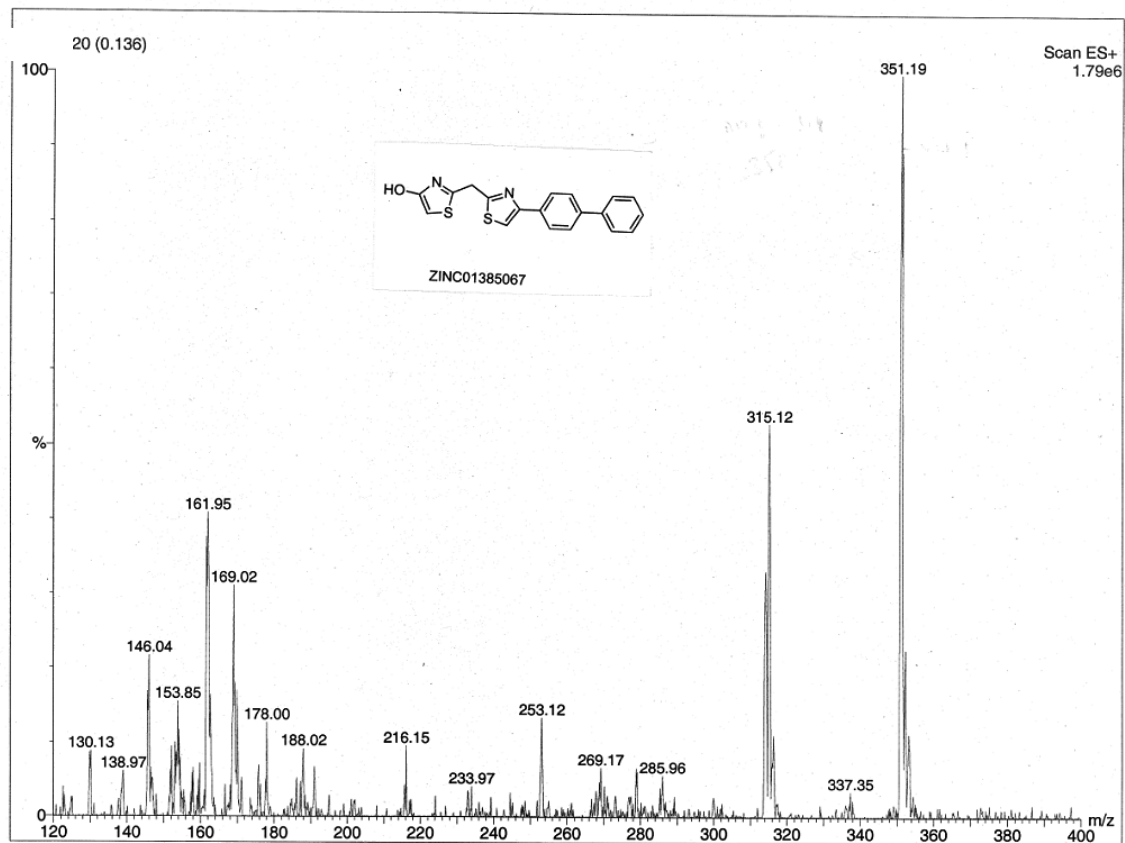

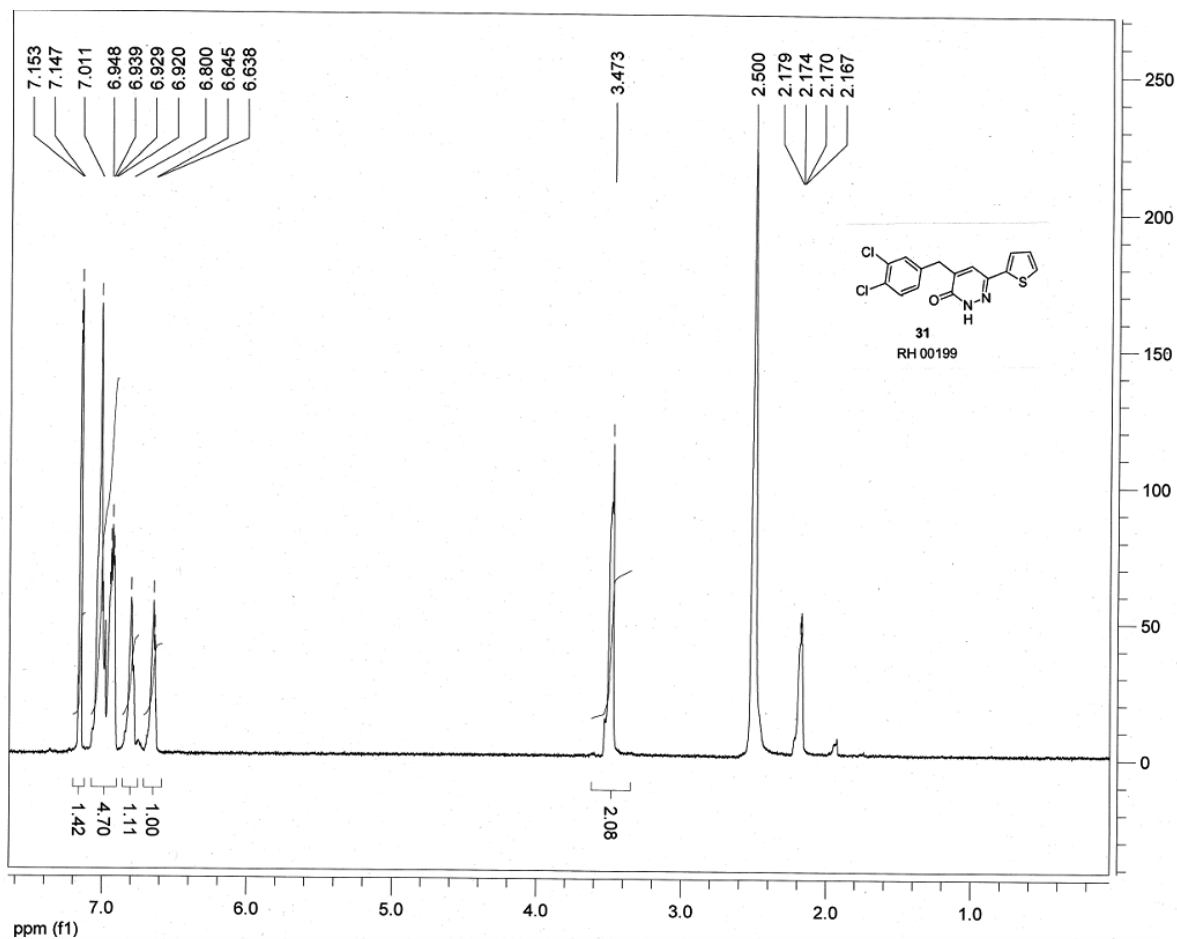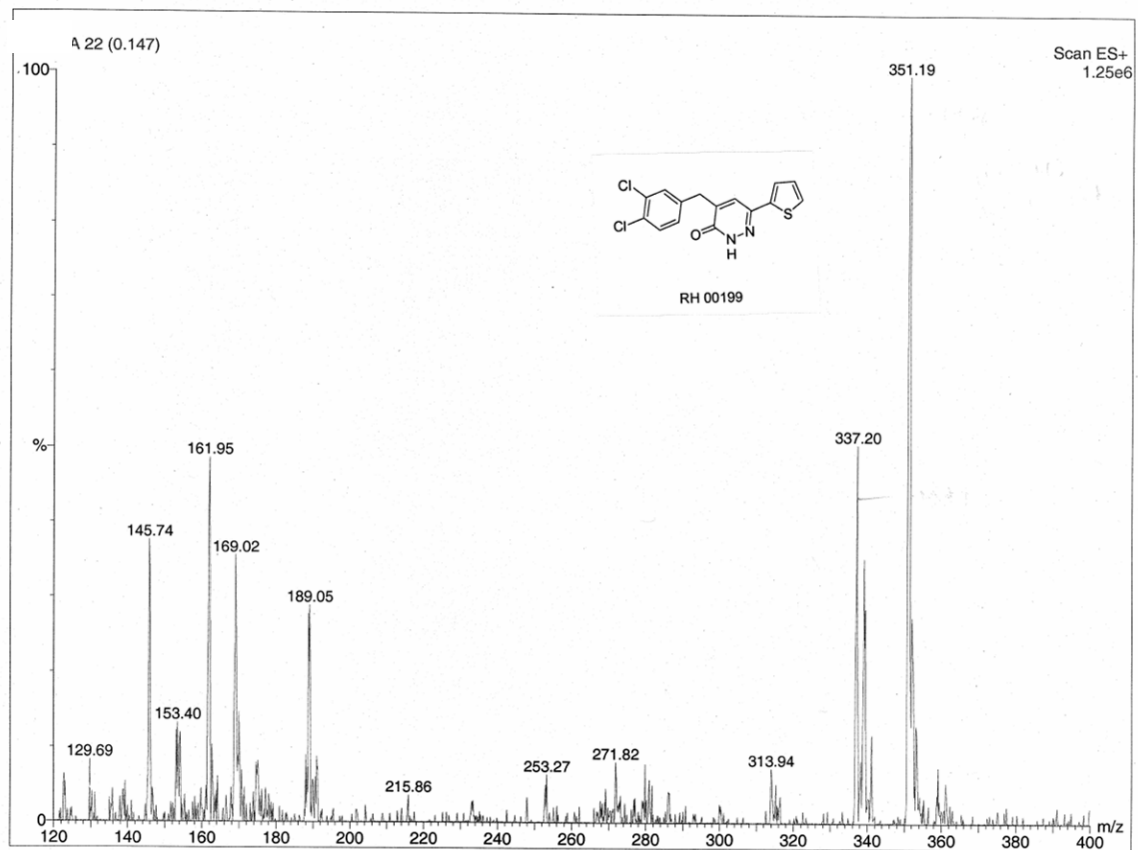

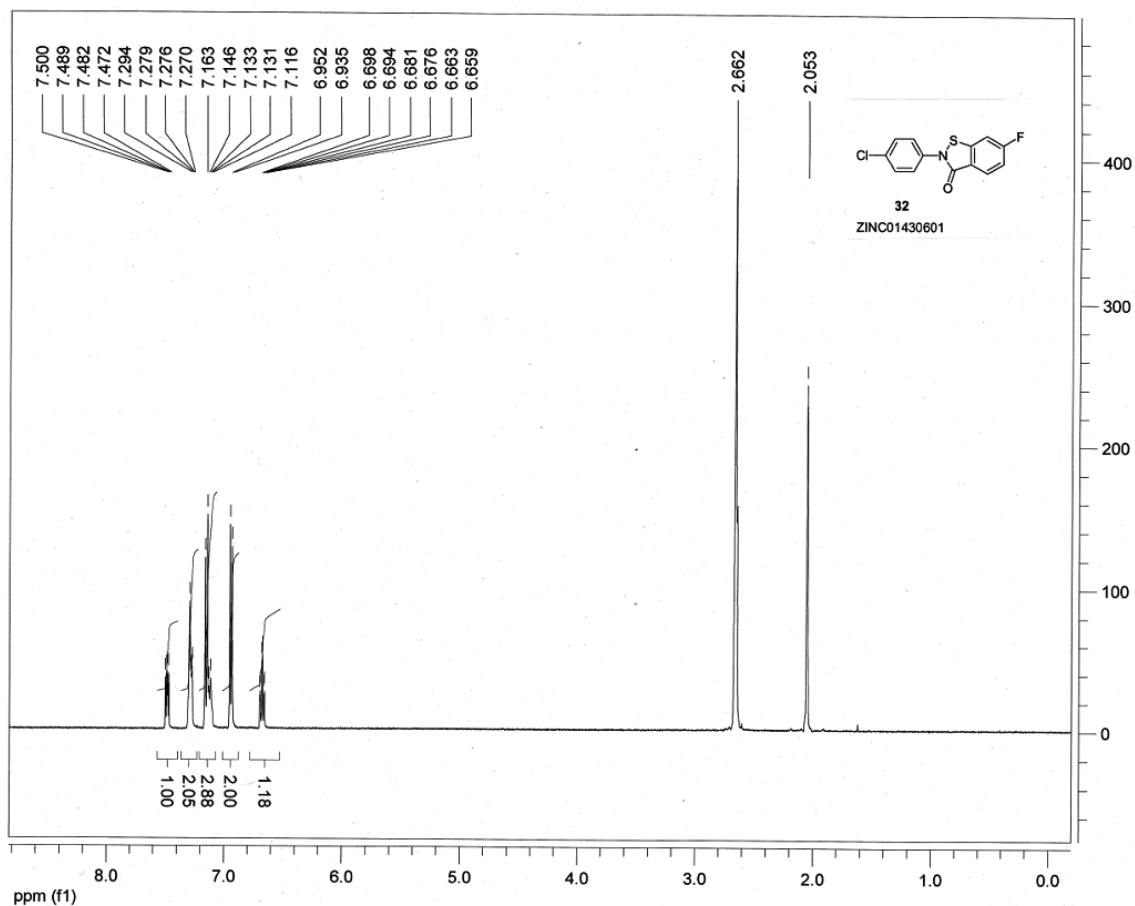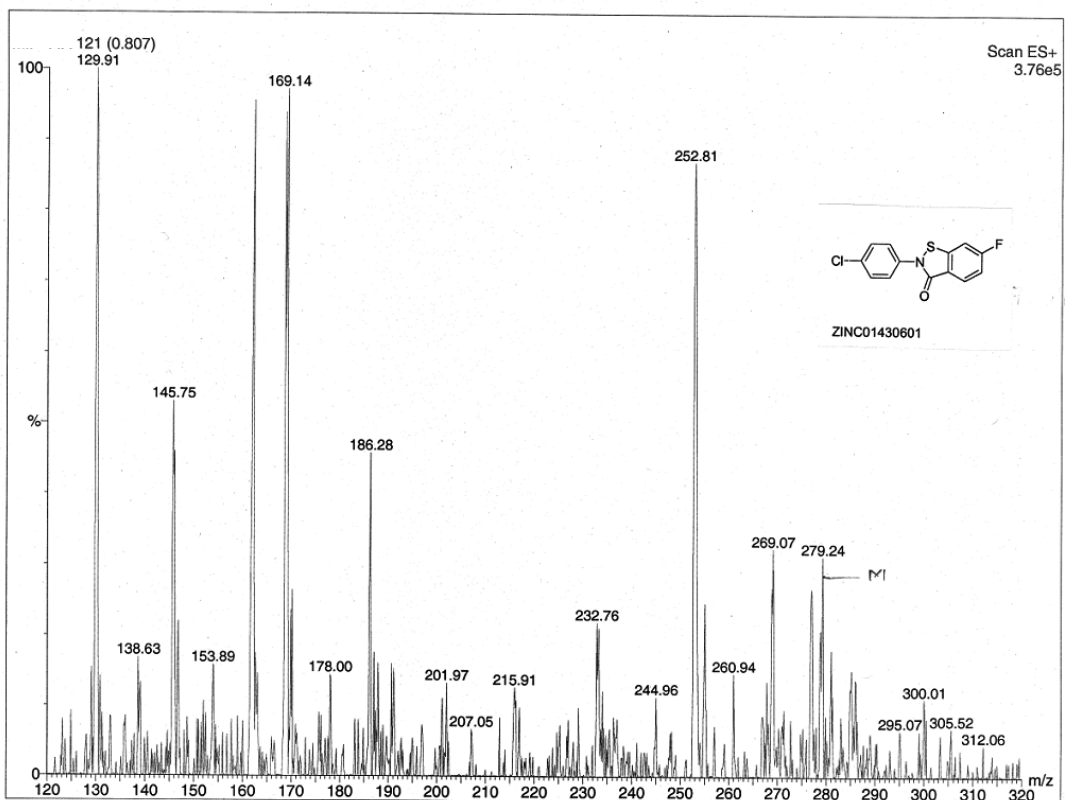

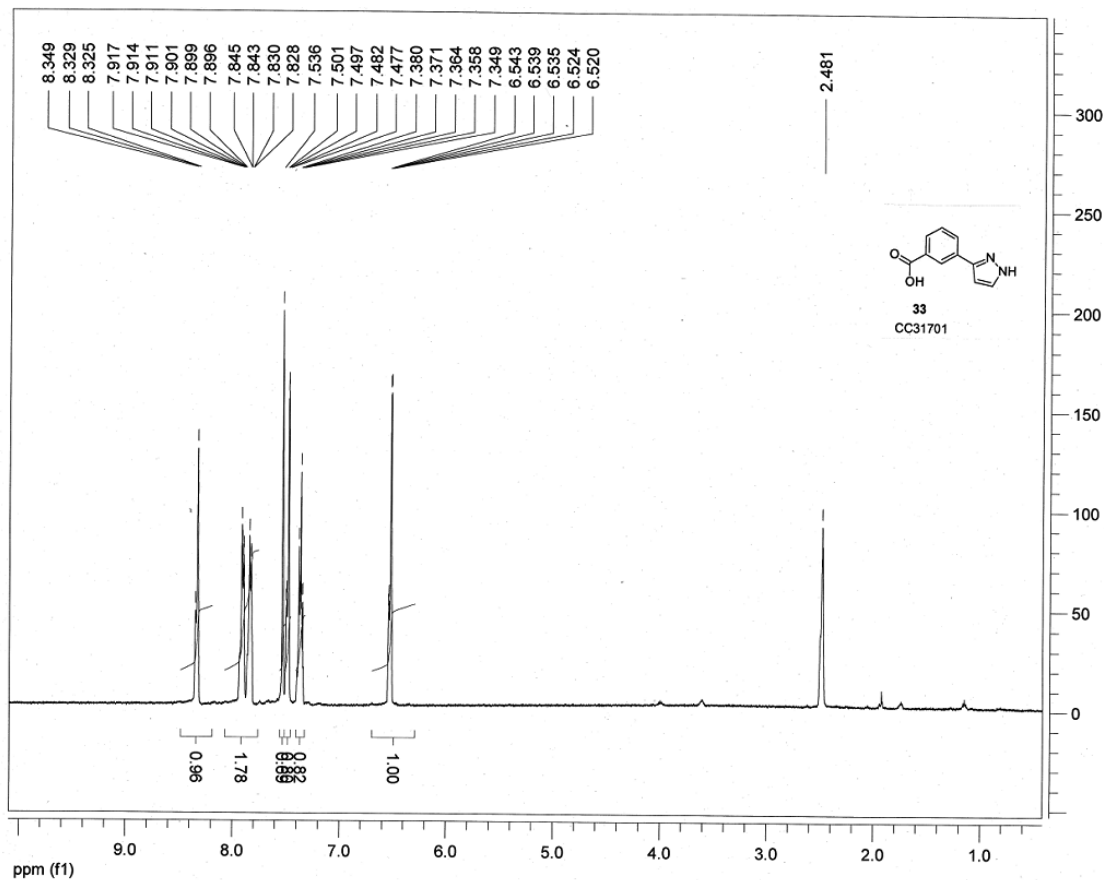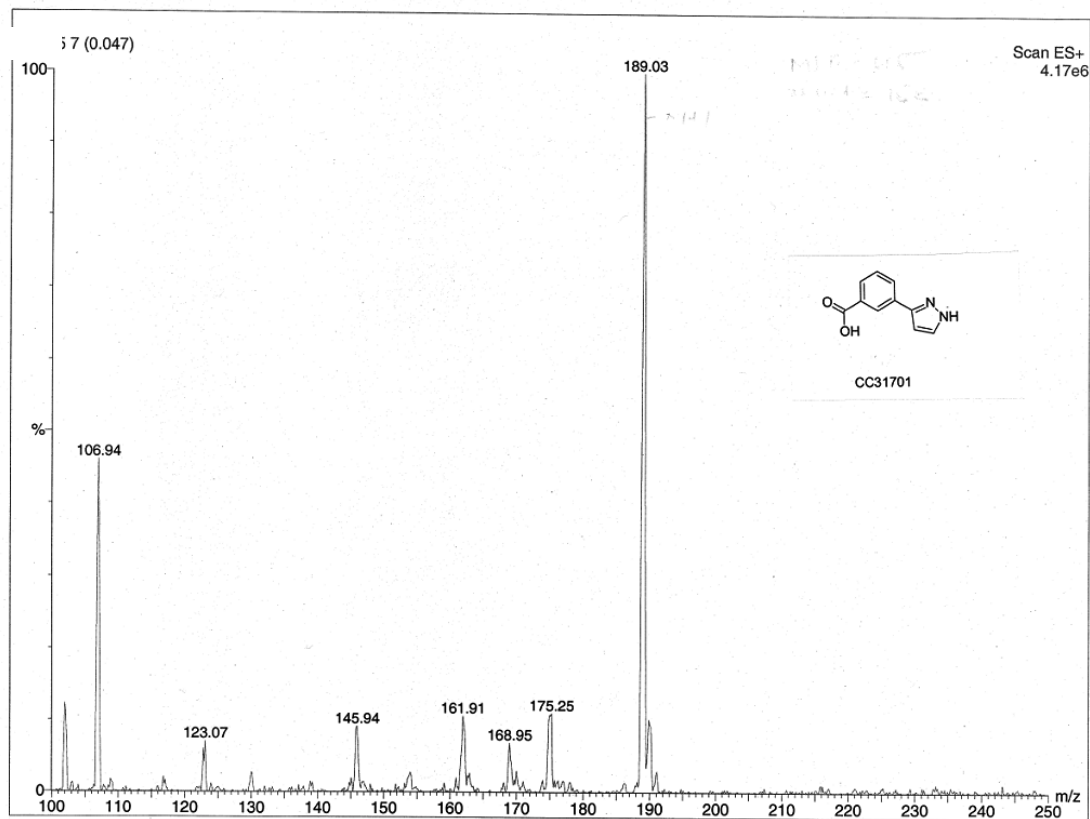

Supplement: Supplementary file 1 [file 4581547]
